# Supplementary material for: Do Urban Decentralization Policies Affect the Green Space? A Case Study of Beijing
Source: Research Square preprint supplement (doi:10.21203/rs.3.rs-7111687/v1), 2025-07-21
Supplement: Supplementary file 1 [file 990bdc732f761771c9c17b65.docx]

**Appendix**

The appendix of this study contains two parts, results of parallel trend test, and results of Sobel test.

**1. Results of parallel trend test**

**1.1. Parallel trend testing of different functional areas**

This section corresponds to Table 2 (Benchmark regression results for comparing different functional areas.)

1.1.1. CUA & UDA


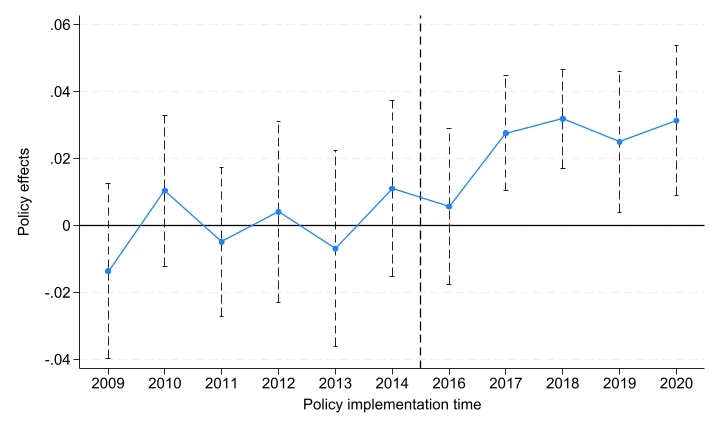


1.1.2. CUA & ECA


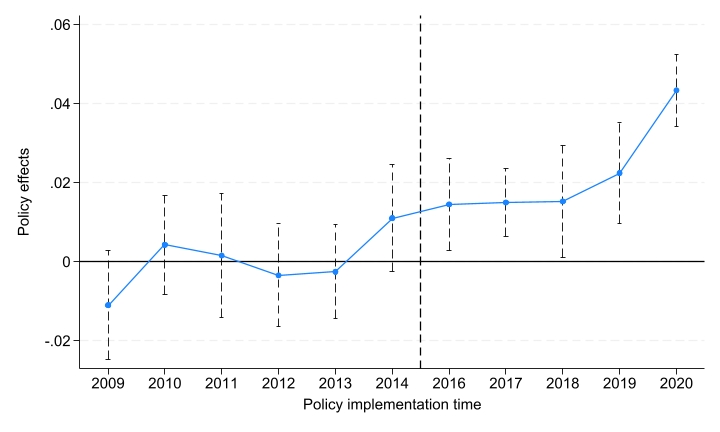


1.1.3. UDA & ECA


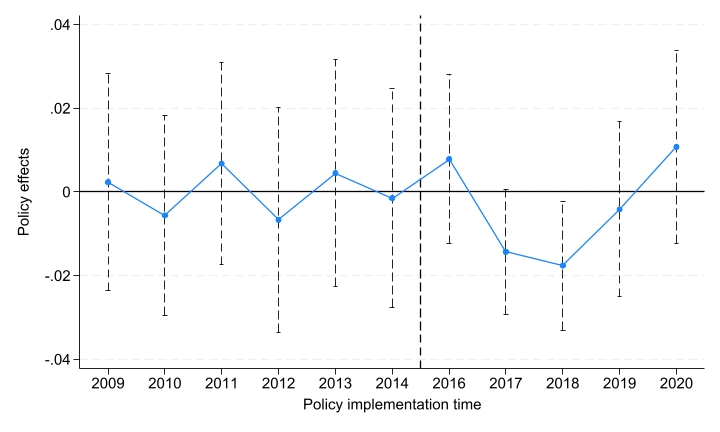


**1.2. Parallel trend test in different administrative regions**

This section corresponds to Table 3 (Benchmark regression results are based on different districts.)

1.2.1. Xicheng


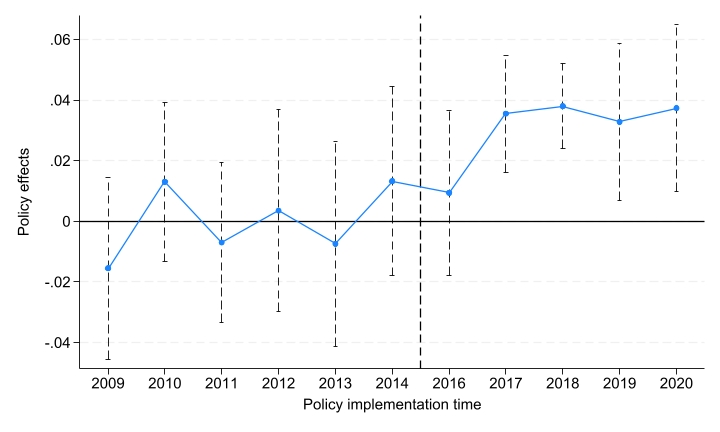


1.2.2. Shijingshan


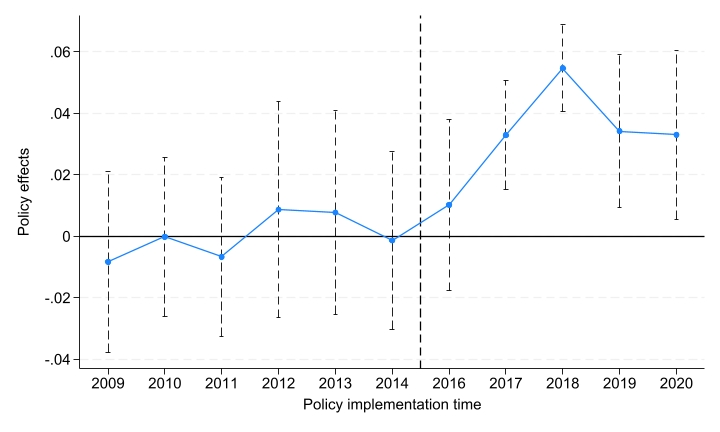


1.2.3. Fengtai


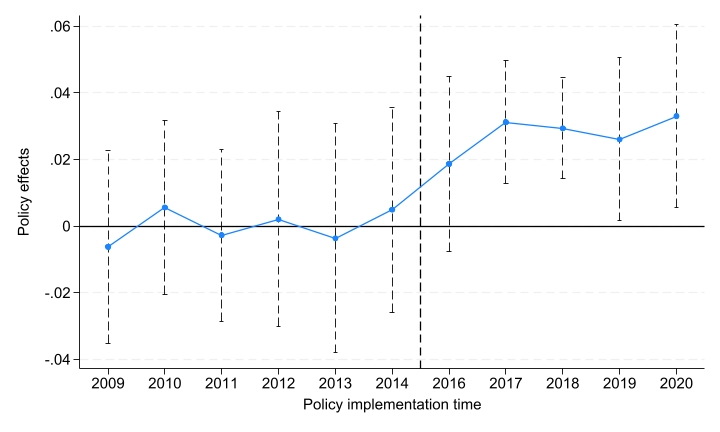


1.2.4. Haidian


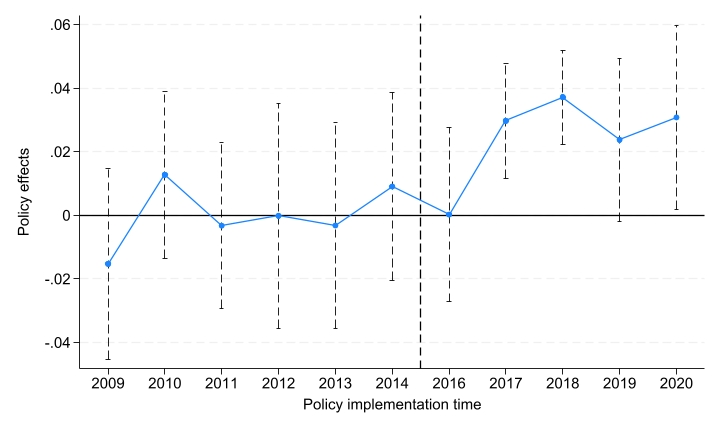


1.2.5. Chaoyang


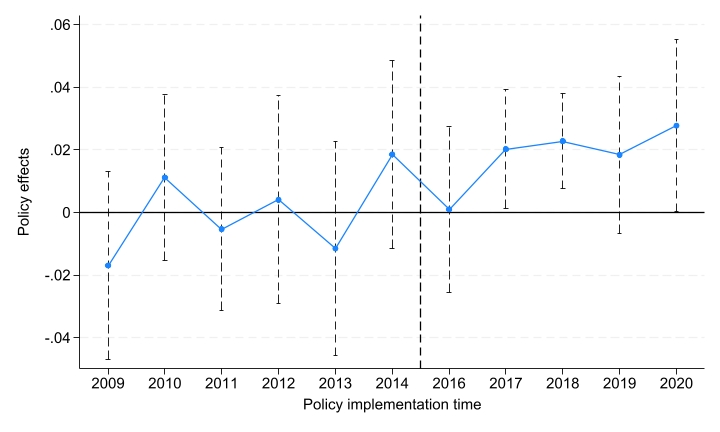


1.2.6. Dongcheng


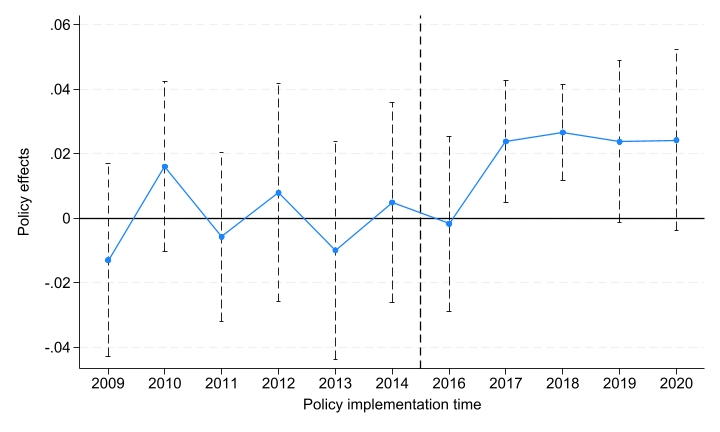


1.2.7. Changping


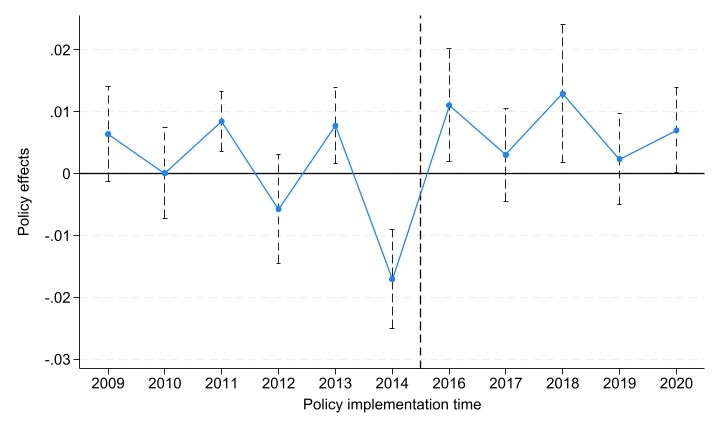


1.2.8. Daxing


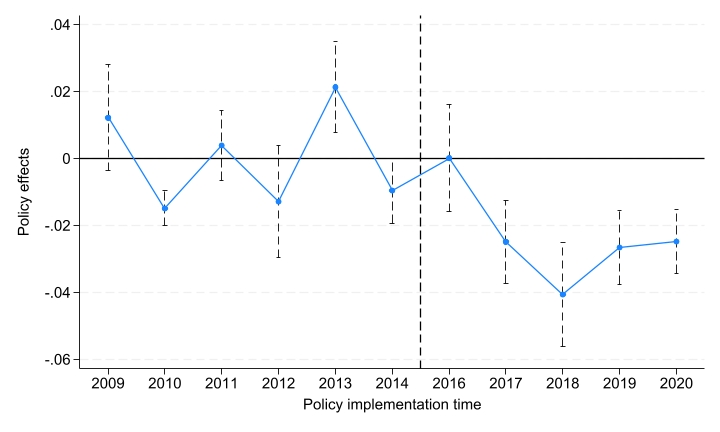


1.2.9. Fangshan


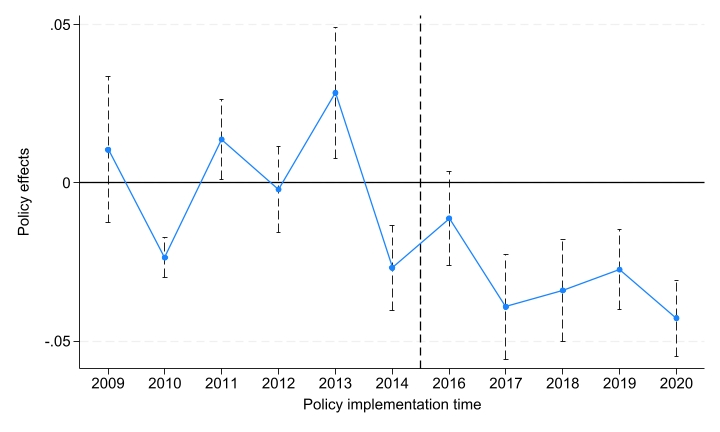


1.2.10. Tongzhou


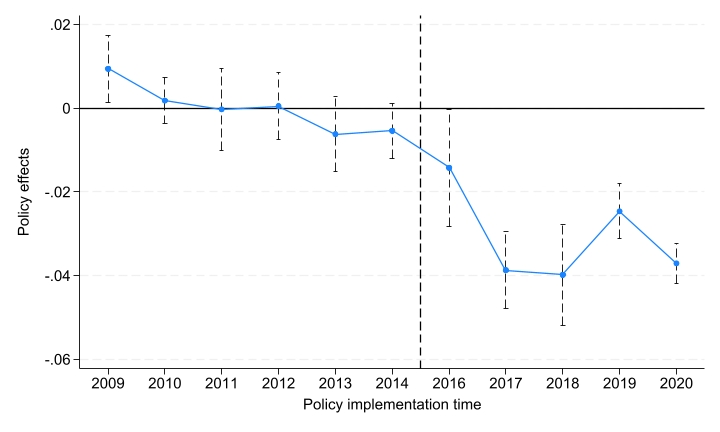


1.2.11. Shunyi


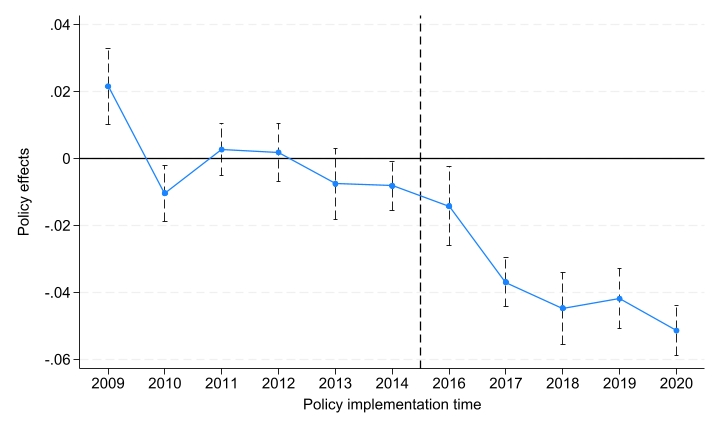


**1.3. Parallel trend test of streets with different population densities**

This section corresponds to Table 4 (Benchmark regression results are based on subdistricts with different population densities.)

1.3.1. HDS in CUA


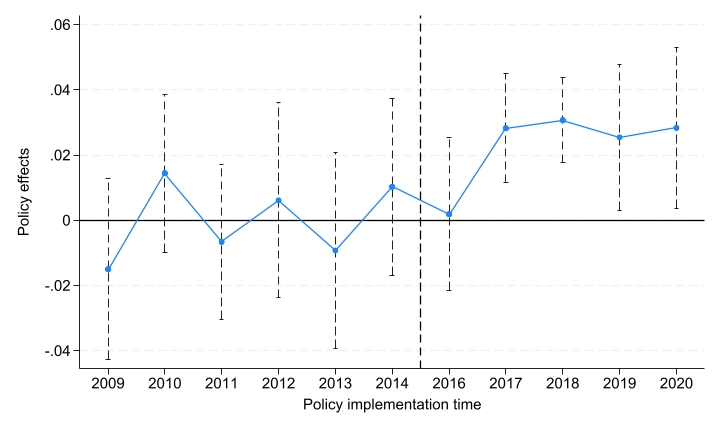


1.3.2. MDS in CUA


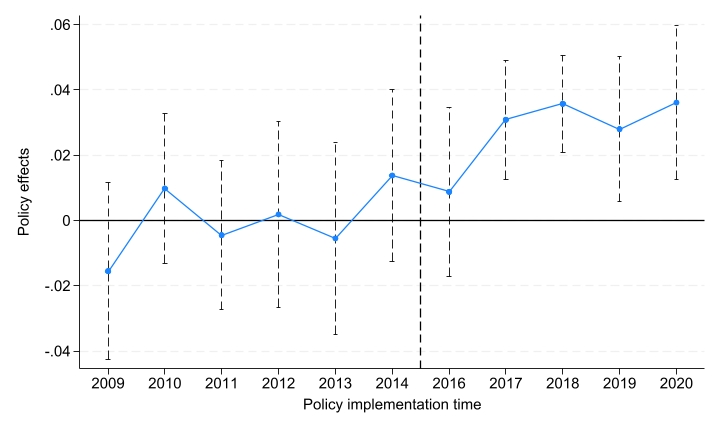


1.3.3. LDS in CUA


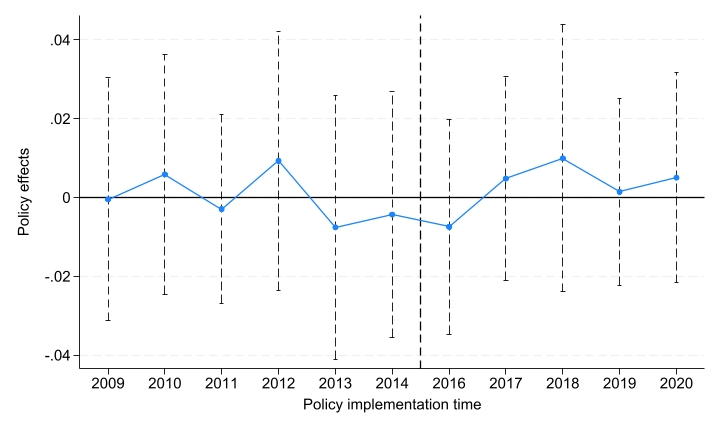


1.3.4. MDS in UDA


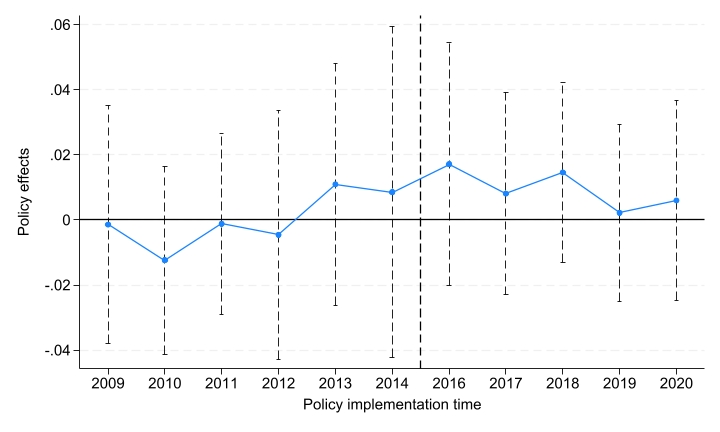


1.3.5. LDS in UDA


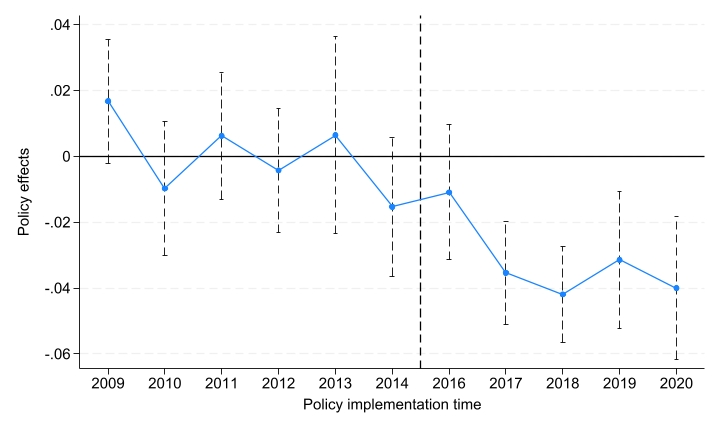


**2. Sobel test results**

**2.1. Sobel test in different administrative regions**

This section corresponds to Table 5 (Proportion of mediating effects of mechanism variables in different districts in the central urban area.)

2.1.1. Xicheng

Xicheng gdp

Sobel-Goodman Mediation Tests

| Est Std_err z P>|z|

---------------------+-----------------------------------------------

Sobel | 0.018 0.002 8.829 0.000

Aroian | 0.018 0.002 8.816 0.000

Goodman | 0.018 0.002 8.842 0.000

Indirect, Direct, and Total Effects

| Est Std_err z P>|z|

---------------------+-----------------------------------------------

a_coefficient | 3.811 0.349 10.912 0.000

b_coefficient | 0.005 0.000 15.025 0.000

Indirect_effect_aXb | 0.018 0.002 8.829 0.000

Direct_effect_c' | 0.015 0.004 4.008 0.000

Total_effect_c | 0.032 0.004 8.504 0.000

Proportion of total effect that is mediated: 0.549

Ratio of indirect to direct effect: 1.219

Ratio of total to direct effect: 2.219

Xicheng imp

Sobel-Goodman Mediation Tests

| Est Std_err z P>|z|

---------------------+-----------------------------------------------

Sobel | 0.016 0.002 8.311 0.000

Aroian | 0.016 0.002 8.298 0.000

Goodman | 0.016 0.002 8.323 0.000

Indirect, Direct, and Total Effects

| Est Std_err z P>|z|

---------------------+-----------------------------------------------

a_coefficient | -0.045 0.003 -15.202 0.000

b_coefficient | -0.354 0.036 -9.925 0.000

Indirect_effect_aXb | 0.016 0.002 8.311 0.000

Direct_effect_c' | 0.017 0.004 4.429 0.000

Total_effect_c | 0.033 0.004 9.013 0.000

Proportion of total effect that is mediated: 0.482

Ratio of indirect to direct effect: 0.931

Ratio of total to direct effect: 1.931

Xicheng ntl

Sobel-Goodman Mediation Tests

| Est Std_err z P>|z|

---------------------+-----------------------------------------------

Sobel | -0.008 0.002 -4.513 0.000

Aroian | -0.008 0.002 -4.504 0.000

Goodman | -0.008 0.002 -4.522 0.000

Indirect, Direct, and Total Effects

| Est Std_err z P>|z|

---------------------+-----------------------------------------------

a_coefficient | 49.455 3.281 15.072 0.000

b_coefficient | -0.000 0.000 -4.730 0.000

Indirect_effect_aXb | -0.008 0.002 -4.513 0.000

Direct_effect_c' | 0.041 0.004 10.241 0.000

Total_effect_c | 0.033 0.004 9.013 0.000

Proportion of total effect that is mediated: -0.235

Ratio of indirect to direct effect: -0.191

Ratio of total to direct effect: 0.809

Xicheng pop

Sobel-Goodman Mediation Tests

| Est Std_err z P>|z|

---------------------+-----------------------------------------------

Sobel | 0.002 0.002 1.412 0.158

Aroian | 0.002 0.002 1.409 0.159

Goodman | 0.002 0.002 1.415 0.157

Indirect, Direct, and Total Effects

| Est Std_err z P>|z|

---------------------+-----------------------------------------------

a_coefficient | 1946.699 125.963 15.454 0.000

b_coefficient | 0.000 0.000 1.418 0.156

Indirect_effect_aXb | 0.002 0.002 1.412 0.158

Direct_effect_c' | 0.030 0.004 7.582 0.000

Total_effect_c | 0.033 0.004 9.013 0.000

Proportion of total effect that is mediated: 0.073

Ratio of indirect to direct effect: 0.079

Ratio of total to direct effect: 1.079

Xicheng vgdp

Sobel-Goodman Mediation Tests

| Est Std_err z P>|z|

---------------------+-----------------------------------------------

Sobel | 0.005 0.001 4.098 0.000

Aroian | 0.005 0.001 4.075 0.000

Goodman | 0.005 0.001 4.121 0.000

Indirect, Direct, and Total Effects

| Est Std_err z P>|z|

---------------------+-----------------------------------------------

a_coefficient | -0.293 0.062 -4.715 0.000

b_coefficient | -0.015 0.002 -8.285 0.000

Indirect_effect_aXb | 0.005 0.001 4.098 0.000

Direct_effect_c' | 0.028 0.004 7.472 0.000

Total_effect_c | 0.032 0.004 8.504 0.000

Proportion of total effect that is mediated: 0.140

Ratio of indirect to direct effect: 0.163

Ratio of total to direct effect: 1.163

Xicheng vimp

Sobel-Goodman Mediation Tests

| Est Std_err z P>|z|

---------------------+-----------------------------------------------

Sobel | 0.003 0.001 2.829 0.005

Aroian | 0.003 0.001 2.813 0.005

Goodman | 0.003 0.001 2.845 0.004

Indirect, Direct, and Total Effects

| Est Std_err z P>|z|

---------------------+-----------------------------------------------

a_coefficient | 0.017 0.002 8.862 0.000

b_coefficient | 0.175 0.058 2.985 0.003

Indirect_effect_aXb | 0.003 0.001 2.829 0.005

Direct_effect_c' | 0.030 0.004 7.973 0.000

Total_effect_c | 0.033 0.004 9.013 0.000

Proportion of total effect that is mediated: 0.088

Ratio of indirect to direct effect: 0.096

Ratio of total to direct effect: 1.096

Xicheng vntl

Sobel-Goodman Mediation Tests

| Est Std_err z P>|z|

---------------------+-----------------------------------------------

Sobel | -0.005 0.001 -4.754 0.000

Aroian | -0.005 0.001 -4.731 0.000

Goodman | -0.005 0.001 -4.779 0.000

Indirect, Direct, and Total Effects

| Est Std_err z P>|z|

---------------------+-----------------------------------------------

a_coefficient | -13.339 1.665 -8.012 0.000

b_coefficient | 0.000 0.000 5.907 0.000

Indirect_effect_aXb | -0.005 0.001 -4.754 0.000

Direct_effect_c' | 0.038 0.004 10.278 0.000

Total_effect_c | 0.033 0.004 9.013 0.000

Proportion of total effect that is mediated: -0.155

Ratio of indirect to direct effect: -0.134

Ratio of total to direct effect: 0.866

Xicheng vpop

Sobel-Goodman Mediation Tests

| Est Std_err z P>|z|

---------------------+-----------------------------------------------

Sobel | 0.004 0.001 3.423 0.001

Aroian | 0.004 0.001 3.408 0.001

Goodman | 0.004 0.001 3.438 0.001

Indirect, Direct, and Total Effects

| Est Std_err z P>|z|

---------------------+-----------------------------------------------

a_coefficient | -810.077 81.579 -9.930 0.000

b_coefficient | -0.000 0.000 -3.646 0.000

Indirect_effect_aXb | 0.004 0.001 3.423 0.001

Direct_effect_c' | 0.029 0.004 7.643 0.000

Total_effect_c | 0.033 0.004 9.013 0.000

Proportion of total effect that is mediated: 0.120

Ratio of indirect to direct effect: 0.136

Ratio of total to direct effect: 1.136

2.1.2. Shijingshan

Shijingshan gdp

Sobel-Goodman Mediation Tests

| Est Std_err z P>|z|

---------------------+-----------------------------------------------

Sobel | 0.014 0.002 6.207 0.000

Aroian | 0.014 0.002 6.196 0.000

Goodman | 0.014 0.002 6.219 0.000

Indirect, Direct, and Total Effects

| Est Std_err z P>|z|

---------------------+-----------------------------------------------

a_coefficient | 3.046 0.445 6.848 0.000

b_coefficient | 0.005 0.000 14.697 0.000

Indirect_effect_aXb | 0.014 0.002 6.207 0.000

Direct_effect_c' | 0.019 0.004 4.178 0.000

Total_effect_c | 0.033 0.005 6.816 0.000

Proportion of total effect that is mediated: 0.433

Ratio of indirect to direct effect: 0.764

Ratio of total to direct effect: 1.764

Shijingshan imp

Sobel-Goodman Mediation Tests

| Est Std_err z P>|z|

---------------------+-----------------------------------------------

Sobel | 0.014 0.002 7.105 0.000

Aroian | 0.014 0.002 7.088 0.000

Goodman | 0.014 0.002 7.123 0.000

Indirect, Direct, and Total Effects

| Est Std_err z P>|z|

---------------------+-----------------------------------------------

a_coefficient | -0.038 0.004 -10.191 0.000

b_coefficient | -0.368 0.037 -9.912 0.000

Indirect_effect_aXb | 0.014 0.002 7.105 0.000

Direct_effect_c' | 0.019 0.005 4.020 0.000

Total_effect_c | 0.033 0.005 7.025 0.000

Proportion of total effect that is mediated: 0.426

Ratio of indirect to direct effect: 0.742

Ratio of total to direct effect: 1.742

Shijingshan ntl

Sobel-Goodman Mediation Tests

| Est Std_err z P>|z|

---------------------+-----------------------------------------------

Sobel | -0.001 0.001 -1.130 0.259

Aroian | -0.001 0.001 -1.110 0.267

Goodman | -0.001 0.001 -1.151 0.250

Indirect, Direct, and Total Effects

| Est Std_err z P>|z|

---------------------+-----------------------------------------------

a_coefficient | 4.527 3.908 1.158 0.247

b_coefficient | -0.000 0.000 -5.129 0.000

Indirect_effect_aXb | -0.001 0.001 -1.130 0.259

Direct_effect_c' | 0.034 0.005 7.289 0.000

Total_effect_c | 0.033 0.005 7.025 0.000

Proportion of total effect that is mediated: -0.026

Ratio of indirect to direct effect: -0.025

Ratio of total to direct effect: 0.975

Shijingshan pop

Sobel-Goodman Mediation Tests

| Est Std_err z P>|z|

---------------------+-----------------------------------------------

Sobel | 0.004 0.001 3.417 0.001

Aroian | 0.004 0.001 3.395 0.001

Goodman | 0.004 0.001 3.440 0.001

Indirect, Direct, and Total Effects

| Est Std_err z P>|z|

---------------------+-----------------------------------------------

a_coefficient | 698.414 89.437 7.809 0.000

b_coefficient | 0.000 0.000 3.801 0.000

Indirect_effect_aXb | 0.004 0.001 3.417 0.001

Direct_effect_c' | 0.028 0.005 5.978 0.000

Total_effect_c | 0.033 0.005 7.025 0.000

Proportion of total effect that is mediated: 0.130

Ratio of indirect to direct effect: 0.149

Ratio of total to direct effect: 1.149

Shijingshan vgdp

Sobel-Goodman Mediation Tests

| Est Std_err z P>|z|

---------------------+-----------------------------------------------

Sobel | 0.002 0.001 1.772 0.076

Aroian | 0.002 0.001 1.760 0.078

Goodman | 0.002 0.001 1.785 0.074

Indirect, Direct, and Total Effects

| Est Std_err z P>|z|

---------------------+-----------------------------------------------

a_coefficient | -0.143 0.079 -1.815 0.069

b_coefficient | -0.016 0.002 -8.173 0.000

Indirect_effect_aXb | 0.002 0.001 1.772 0.076

Direct_effect_c' | 0.031 0.005 6.555 0.000

Total_effect_c | 0.033 0.005 6.816 0.000

Proportion of total effect that is mediated: 0.068

Ratio of indirect to direct effect: 0.073

Ratio of total to direct effect: 1.073

Shijingshan vimp

Sobel-Goodman Mediation Tests

| Est Std_err z P>|z|

---------------------+-----------------------------------------------

Sobel | 0.003 0.001 2.395 0.017

Aroian | 0.003 0.001 2.373 0.018

Goodman | 0.003 0.001 2.418 0.016

Indirect, Direct, and Total Effects

| Est Std_err z P>|z|

---------------------+-----------------------------------------------

a_coefficient | 0.016 0.002 6.861 0.000

b_coefficient | 0.154 0.060 2.556 0.011

Indirect_effect_aXb | 0.003 0.001 2.395 0.017

Direct_effect_c' | 0.030 0.005 6.358 0.000

Total_effect_c | 0.033 0.005 7.025 0.000

Proportion of total effect that is mediated: 0.077

Ratio of indirect to direct effect: 0.084

Ratio of total to direct effect: 1.084

Shijingshan vntl

Sobel-Goodman Mediation Tests

| Est Std_err z P>|z|

---------------------+-----------------------------------------------

Sobel | 0.002 0.001 2.212 0.027

Aroian | 0.002 0.001 2.180 0.029

Goodman | 0.002 0.001 2.246 0.025

Indirect, Direct, and Total Effects

| Est Std_err z P>|z|

---------------------+-----------------------------------------------

a_coefficient | 4.595 1.881 2.442 0.015

b_coefficient | 0.000 0.000 5.222 0.000

Indirect_effect_aXb | 0.002 0.001 2.212 0.027

Direct_effect_c' | 0.031 0.005 6.698 0.000

Total_effect_c | 0.033 0.005 7.025 0.000

Proportion of total effect that is mediated: 0.056

Ratio of indirect to direct effect: 0.059

Ratio of total to direct effect: 1.059

Shijingshan vpop

Sobel-Goodman Mediation Tests

| Est Std_err z P>|z|

---------------------+-----------------------------------------------

Sobel | 0.003 0.001 3.165 0.002

Aroian | 0.003 0.001 3.131 0.002

Goodman | 0.003 0.001 3.200 0.001

Indirect, Direct, and Total Effects

| Est Std_err z P>|z|

---------------------+-----------------------------------------------

a_coefficient | -241.588 62.891 -3.841 0.000

b_coefficient | -0.000 0.000 -5.585 0.000

Indirect_effect_aXb | 0.003 0.001 3.165 0.002

Direct_effect_c' | 0.030 0.005 6.416 0.000

Total_effect_c | 0.033 0.005 7.025 0.000

Proportion of total effect that is mediated: 0.093

Ratio of indirect to direct effect: 0.103

Ratio of total to direct effect: 1.103

2.1.3. Fengtai

Fengtai gdp

Sobel-Goodman Mediation Tests

| Est Std_err z P>|z|

---------------------+-----------------------------------------------

Sobel | 0.015 0.002 8.824 0.000

Aroian | 0.015 0.002 8.811 0.000

Goodman | 0.015 0.002 8.836 0.000

Indirect, Direct, and Total Effects

| Est Std_err z P>|z|

---------------------+-----------------------------------------------

a_coefficient | 3.201 0.297 10.778 0.000

b_coefficient | 0.005 0.000 15.367 0.000

Indirect_effect_aXb | 0.015 0.002 8.824 0.000

Direct_effect_c' | 0.012 0.003 4.042 0.000

Total_effect_c | 0.027 0.003 8.443 0.000

Proportion of total effect that is mediated: 0.544

Ratio of indirect to direct effect: 1.191

Ratio of total to direct effect: 2.191

Fengtai imp

Sobel-Goodman Mediation Tests

| Est Std_err z P>|z|

---------------------+-----------------------------------------------

Sobel | 0.013 0.002 8.252 0.000

Aroian | 0.013 0.002 8.239 0.000

Goodman | 0.013 0.002 8.265 0.000

Indirect, Direct, and Total Effects

| Est Std_err z P>|z|

---------------------+-----------------------------------------------

a_coefficient | -0.038 0.003 -14.797 0.000

b_coefficient | -0.345 0.035 -9.941 0.000

Indirect_effect_aXb | 0.013 0.002 8.252 0.000

Direct_effect_c' | 0.015 0.003 4.605 0.000

Total_effect_c | 0.028 0.003 8.944 0.000

Proportion of total effect that is mediated: 0.461

Ratio of indirect to direct effect: 0.856

Ratio of total to direct effect: 1.856

Fengtai ntl

Sobel-Goodman Mediation Tests

| Est Std_err z P>|z|

---------------------+-----------------------------------------------

Sobel | -0.002 0.001 -2.732 0.006

Aroian | -0.002 0.001 -2.706 0.007

Goodman | -0.002 0.001 -2.759 0.006

Indirect, Direct, and Total Effects

| Est Std_err z P>|z|

---------------------+-----------------------------------------------

a_coefficient | 18.698 2.870 6.514 0.000

b_coefficient | -0.000 0.000 -3.010 0.003

Indirect_effect_aXb | -0.002 0.001 -2.732 0.006

Direct_effect_c' | 0.030 0.003 9.378 0.000

Total_effect_c | 0.028 0.003 8.944 0.000

Proportion of total effect that is mediated: -0.064

Ratio of indirect to direct effect: -0.060

Ratio of total to direct effect: 0.940

Fengtai pop

Sobel-Goodman Mediation Tests

| Est Std_err z P>|z|

---------------------+-----------------------------------------------

Sobel | 0.001 0.000 1.613 0.107

Aroian | 0.001 0.000 1.550 0.121

Goodman | 0.001 0.000 1.683 0.092

Indirect, Direct, and Total Effects

| Est Std_err z P>|z|

---------------------+-----------------------------------------------

a_coefficient | 216.948 74.542 2.910 0.004

b_coefficient | 0.000 0.000 1.937 0.053

Indirect_effect_aXb | 0.001 0.000 1.613 0.107

Direct_effect_c' | 0.028 0.003 8.758 0.000

Total_effect_c | 0.028 0.003 8.944 0.000

Proportion of total effect that is mediated: 0.018

Ratio of indirect to direct effect: 0.019

Ratio of total to direct effect: 1.019

Fengtai vgdp

Sobel-Goodman Mediation Tests

| Est Std_err z P>|z|

---------------------+-----------------------------------------------

Sobel | 0.003 0.001 3.248 0.001

Aroian | 0.003 0.001 3.228 0.001

Goodman | 0.003 0.001 3.269 0.001

Indirect, Direct, and Total Effects

| Est Std_err z P>|z|

---------------------+-----------------------------------------------

a_coefficient | -0.191 0.054 -3.547 0.000

b_coefficient | -0.014 0.002 -8.086 0.000

Indirect_effect_aXb | 0.003 0.001 3.248 0.001

Direct_effect_c' | 0.025 0.003 7.770 0.000

Total_effect_c | 0.027 0.003 8.443 0.000

Proportion of total effect that is mediated: 0.101

Ratio of indirect to direct effect: 0.112

Ratio of total to direct effect: 1.112

Fengtai vimp

Sobel-Goodman Mediation Tests

| Est Std_err z P>|z|

---------------------+-----------------------------------------------

Sobel | 0.003 0.001 3.068 0.002

Aroian | 0.003 0.001 3.052 0.002

Goodman | 0.003 0.001 3.085 0.002

Indirect, Direct, and Total Effects

| Est Std_err z P>|z|

---------------------+-----------------------------------------------

a_coefficient | 0.015 0.002 9.119 0.000

b_coefficient | 0.185 0.057 3.258 0.001

Indirect_effect_aXb | 0.003 0.001 3.068 0.002

Direct_effect_c' | 0.025 0.003 7.840 0.000

Total_effect_c | 0.028 0.003 8.944 0.000

Proportion of total effect that is mediated: 0.097

Ratio of indirect to direct effect: 0.107

Ratio of total to direct effect: 1.107

Fengtai vntl

Sobel-Goodman Mediation Tests

| Est Std_err z P>|z|

---------------------+-----------------------------------------------

Sobel | -0.001 0.001 -2.514 0.012

Aroian | -0.001 0.001 -2.475 0.013

Goodman | -0.001 0.000 -2.555 0.011

Indirect, Direct, and Total Effects

| Est Std_err z P>|z|

---------------------+-----------------------------------------------

a_coefficient | -3.937 1.329 -2.963 0.003

b_coefficient | 0.000 0.000 4.751 0.000

Indirect_effect_aXb | -0.001 0.001 -2.514 0.012

Direct_effect_c' | 0.029 0.003 9.401 0.000

Total_effect_c | 0.028 0.003 8.944 0.000

Proportion of total effect that is mediated: -0.046

Ratio of indirect to direct effect: -0.044

Ratio of total to direct effect: 0.956

Fengtai vpop

Sobel-Goodman Mediation Tests

| Est Std_err z P>|z|

---------------------+-----------------------------------------------

Sobel | 0.002 0.001 3.415 0.001

Aroian | 0.002 0.001 3.379 0.001

Goodman | 0.002 0.001 3.452 0.001

Indirect, Direct, and Total Effects

| Est Std_err z P>|z|

---------------------+-----------------------------------------------

a_coefficient | -246.987 53.217 -4.641 0.000

b_coefficient | -0.000 0.000 -5.043 0.000

Indirect_effect_aXb | 0.002 0.001 3.415 0.001

Direct_effect_c' | 0.026 0.003 8.277 0.000

Total_effect_c | 0.028 0.003 8.944 0.000

Proportion of total effect that is mediated: 0.076

Ratio of indirect to direct effect: 0.082

Ratio of total to direct effect: 1.082

2.1.4. Haidian

Haidian gdp

Sobel-Goodman Mediation Tests

| Est Std_err z P>|z|

---------------------+-----------------------------------------------

Sobel | 0.014 0.002 9.490 0.000

Aroian | 0.014 0.002 9.478 0.000

Goodman | 0.014 0.002 9.502 0.000

Indirect, Direct, and Total Effects

| Est Std_err z P>|z|

---------------------+-----------------------------------------------

a_coefficient | 3.146 0.262 12.011 0.000

b_coefficient | 0.005 0.000 15.483 0.000

Indirect_effect_aXb | 0.014 0.002 9.490 0.000

Direct_effect_c' | 0.012 0.003 4.386 0.000

Total_effect_c | 0.027 0.003 9.229 0.000

Proportion of total effect that is mediated: 0.541

Ratio of indirect to direct effect: 1.180

Ratio of total to direct effect: 2.180

Haidian imp

Sobel-Goodman Mediation Tests

| Est Std_err z P>|z|

---------------------+-----------------------------------------------

Sobel | 0.012 0.001 8.956 0.000

Aroian | 0.012 0.001 8.943 0.000

Goodman | 0.012 0.001 8.969 0.000

Indirect, Direct, and Total Effects

| Est Std_err z P>|z|

---------------------+-----------------------------------------------

a_coefficient | -0.033 0.002 -14.361 0.000

b_coefficient | -0.379 0.033 -11.456 0.000

Indirect_effect_aXb | 0.012 0.001 8.956 0.000

Direct_effect_c' | 0.015 0.003 5.181 0.000

Total_effect_c | 0.027 0.003 9.730 0.000

Proportion of total effect that is mediated: 0.453

Ratio of indirect to direct effect: 0.829

Ratio of total to direct effect: 1.829

Haidian ntl

Sobel-Goodman Mediation Tests

| Est Std_err z P>|z|

---------------------+-----------------------------------------------

Sobel | -0.003 0.001 -3.088 0.002

Aroian | -0.003 0.001 -3.076 0.002

Goodman | -0.003 0.001 -3.101 0.002

Indirect, Direct, and Total Effects

| Est Std_err z P>|z|

---------------------+-----------------------------------------------

a_coefficient | 26.457 2.450 10.797 0.000

b_coefficient | -0.000 0.000 -3.223 0.001

Indirect_effect_aXb | -0.003 0.001 -3.088 0.002

Direct_effect_c' | 0.030 0.003 10.281 0.000

Total_effect_c | 0.027 0.003 9.730 0.000

Proportion of total effect that is mediated: -0.100

Ratio of indirect to direct effect: -0.091

Ratio of total to direct effect: 0.909

Haidian pop

Sobel-Goodman Mediation Tests

| Est Std_err z P>|z|

---------------------+-----------------------------------------------

Sobel | 0.002 0.001 3.280 0.001

Aroian | 0.002 0.001 3.261 0.001

Goodman | 0.002 0.001 3.300 0.001

Indirect, Direct, and Total Effects

| Est Std_err z P>|z|

---------------------+-----------------------------------------------

a_coefficient | 614.594 72.359 8.494 0.000

b_coefficient | 0.000 0.000 3.556 0.000

Indirect_effect_aXb | 0.002 0.001 3.280 0.001

Direct_effect_c' | 0.025 0.003 8.680 0.000

Total_effect_c | 0.027 0.003 9.730 0.000

Proportion of total effect that is mediated: 0.087

Ratio of indirect to direct effect: 0.095

Ratio of total to direct effect: 1.095

Haidian vgdp

Sobel-Goodman Mediation Tests

| Est Std_err z P>|z|

---------------------+-----------------------------------------------

Sobel | 0.003 0.001 3.839 0.000

Aroian | 0.003 0.001 3.816 0.000

Goodman | 0.003 0.001 3.863 0.000

Indirect, Direct, and Total Effects

| Est Std_err z P>|z|

---------------------+-----------------------------------------------

a_coefficient | -0.206 0.047 -4.393 0.000

b_coefficient | -0.014 0.002 -7.899 0.000

Indirect_effect_aXb | 0.003 0.001 3.839 0.000

Direct_effect_c' | 0.024 0.003 8.379 0.000

Total_effect_c | 0.027 0.003 9.229 0.000

Proportion of total effect that is mediated: 0.108

Ratio of indirect to direct effect: 0.121

Ratio of total to direct effect: 1.121

Haidian vimp

Sobel-Goodman Mediation Tests

| Est Std_err z P>|z|

---------------------+-----------------------------------------------

Sobel | 0.002 0.001 3.135 0.002

Aroian | 0.002 0.001 3.113 0.002

Goodman | 0.002 0.001 3.157 0.002

Indirect, Direct, and Total Effects

| Est Std_err z P>|z|

---------------------+-----------------------------------------------

a_coefficient | 0.011 0.001 7.690 0.000

b_coefficient | 0.189 0.055 3.433 0.001

Indirect_effect_aXb | 0.002 0.001 3.135 0.002

Direct_effect_c' | 0.025 0.003 8.824 0.000

Total_effect_c | 0.027 0.003 9.730 0.000

Proportion of total effect that is mediated: 0.076

Ratio of indirect to direct effect: 0.082

Ratio of total to direct effect: 1.082

Haidian vntl

Sobel-Goodman Mediation Tests

| Est Std_err z P>|z|

---------------------+-----------------------------------------------

Sobel | -0.001 0.001 -2.448 0.014

Aroian | -0.001 0.001 -2.419 0.016

Goodman | -0.001 0.000 -2.477 0.013

Indirect, Direct, and Total Effects

| Est Std_err z P>|z|

---------------------+-----------------------------------------------

a_coefficient | -3.210 1.194 -2.689 0.007

b_coefficient | 0.000 0.000 5.916 0.000

Indirect_effect_aXb | -0.001 0.001 -2.448 0.014

Direct_effect_c' | 0.028 0.003 10.278 0.000

Total_effect_c | 0.027 0.003 9.730 0.000

Proportion of total effect that is mediated: -0.045

Ratio of indirect to direct effect: -0.043

Ratio of total to direct effect: 0.957

Haidian vpop

Sobel-Goodman Mediation Tests

| Est Std_err z P>|z|

---------------------+-----------------------------------------------

Sobel | 0.002 0.001 3.766 0.000

Aroian | 0.002 0.001 3.737 0.000

Goodman | 0.002 0.001 3.796 0.000

Indirect, Direct, and Total Effects

| Est Std_err z P>|z|

---------------------+-----------------------------------------------

a_coefficient | -312.399 47.838 -6.530 0.000

b_coefficient | -0.000 0.000 -4.610 0.000

Indirect_effect_aXb | 0.002 0.001 3.766 0.000

Direct_effect_c' | 0.025 0.003 8.813 0.000

Total_effect_c | 0.027 0.003 9.730 0.000

Proportion of total effect that is mediated: 0.086

Ratio of indirect to direct effect: 0.095

Ratio of total to direct effect: 1.095

2.1.5. Chaoyang

Chaoyang gdp

Sobel-Goodman Mediation Tests

| Est Std_err z P>|z|

---------------------+-----------------------------------------------

Sobel | 0.015 0.001 10.831 0.000

Aroian | 0.015 0.001 10.820 0.000

Goodman | 0.015 0.001 10.843 0.000

Indirect, Direct, and Total Effects

| Est Std_err z P>|z|

---------------------+-----------------------------------------------

a_coefficient | 3.267 0.212 15.412 0.000

b_coefficient | 0.005 0.000 15.225 0.000

Indirect_effect_aXb | 0.015 0.001 10.831 0.000

Direct_effect_c' | 0.005 0.003 2.059 0.040

Total_effect_c | 0.020 0.003 8.086 0.000

Proportion of total effect that is mediated: 0.745

Ratio of indirect to direct effect: 2.919

Ratio of total to direct effect: 3.919

Chaoyang imp

Sobel-Goodman Mediation Tests

| Est Std_err z P>|z|

---------------------+-----------------------------------------------

Sobel | 0.011 0.001 9.158 0.000

Aroian | 0.011 0.001 9.145 0.000

Goodman | 0.011 0.001 9.170 0.000

Indirect, Direct, and Total Effects

| Est Std_err z P>|z|

---------------------+-----------------------------------------------

a_coefficient | -0.030 0.002 -14.928 0.000

b_coefficient | -0.358 0.031 -11.596 0.000

Indirect_effect_aXb | 0.011 0.001 9.158 0.000

Direct_effect_c' | 0.011 0.002 4.308 0.000

Total_effect_c | 0.021 0.002 8.828 0.000

Proportion of total effect that is mediated: 0.498

Ratio of indirect to direct effect: 0.993

Ratio of total to direct effect: 1.993

Chaoyang ntl

Sobel-Goodman Mediation Tests

| Est Std_err z P>|z|

---------------------+-----------------------------------------------

Sobel | -0.001 0.001 -1.358 0.174

Aroian | -0.001 0.001 -1.355 0.175

Goodman | -0.001 0.001 -1.360 0.174

Indirect, Direct, and Total Effects

| Est Std_err z P>|z|

---------------------+-----------------------------------------------

a_coefficient | 43.808 2.691 16.279 0.000

b_coefficient | -0.000 0.000 -1.363 0.173

Indirect_effect_aXb | -0.001 0.001 -1.358 0.174

Direct_effect_c' | 0.023 0.003 8.646 0.000

Total_effect_c | 0.021 0.002 8.828 0.000

Proportion of total effect that is mediated: -0.067

Ratio of indirect to direct effect: -0.063

Ratio of total to direct effect: 0.937

Chaoyang pop

Sobel-Goodman Mediation Tests

| Est Std_err z P>|z|

---------------------+-----------------------------------------------

Sobel | 0.002 0.001 3.290 0.001

Aroian | 0.002 0.001 3.277 0.001

Goodman | 0.002 0.001 3.303 0.001

Indirect, Direct, and Total Effects

| Est Std_err z P>|z|

---------------------+-----------------------------------------------

a_coefficient | 1029.311 98.063 10.496 0.000

b_coefficient | 0.000 0.000 3.464 0.001

Indirect_effect_aXb | 0.002 0.001 3.290 0.001

Direct_effect_c' | 0.019 0.002 7.606 0.000

Total_effect_c | 0.021 0.002 8.828 0.000

Proportion of total effect that is mediated: 0.109

Ratio of indirect to direct effect: 0.122

Ratio of total to direct effect: 1.122

Chaoyang vgdp

Sobel-Goodman Mediation Tests

| Est Std_err z P>|z|

---------------------+-----------------------------------------------

Sobel | 0.003 0.001 4.792 0.000

Aroian | 0.003 0.001 4.769 0.000

Goodman | 0.003 0.001 4.816 0.000

Indirect, Direct, and Total Effects

| Est Std_err z P>|z|

---------------------+-----------------------------------------------

a_coefficient | -0.223 0.038 -5.856 0.000

b_coefficient | -0.015 0.002 -8.337 0.000

Indirect_effect_aXb | 0.003 0.001 4.792 0.000

Direct_effect_c' | 0.017 0.002 6.847 0.000

Total_effect_c | 0.020 0.003 8.086 0.000

Proportion of total effect that is mediated: 0.164

Ratio of indirect to direct effect: 0.196

Ratio of total to direct effect: 1.196

Chaoyang vimp

Sobel-Goodman Mediation Tests

| Est Std_err z P>|z|

---------------------+-----------------------------------------------

Sobel | 0.002 0.001 3.507 0.000

Aroian | 0.002 0.001 3.490 0.000

Goodman | 0.002 0.001 3.525 0.000

Indirect, Direct, and Total Effects

| Est Std_err z P>|z|

---------------------+-----------------------------------------------

a_coefficient | 0.011 0.001 9.197 0.000

b_coefficient | 0.199 0.052 3.794 0.000

Indirect_effect_aXb | 0.002 0.001 3.507 0.000

Direct_effect_c' | 0.019 0.002 7.715 0.000

Total_effect_c | 0.021 0.002 8.828 0.000

Proportion of total effect that is mediated: 0.105

Ratio of indirect to direct effect: 0.117

Ratio of total to direct effect: 1.117

Chaoyang vntl

Sobel-Goodman Mediation Tests

| Est Std_err z P>|z|

---------------------+-----------------------------------------------

Sobel | -0.003 0.001 -4.150 0.000

Aroian | -0.003 0.001 -4.130 0.000

Goodman | -0.003 0.001 -4.170 0.000

Indirect, Direct, and Total Effects

| Est Std_err z P>|z|

---------------------+-----------------------------------------------

a_coefficient | -11.233 1.248 -9.002 0.000

b_coefficient | 0.000 0.000 4.676 0.000

Indirect_effect_aXb | -0.003 0.001 -4.150 0.000

Direct_effect_c' | 0.024 0.002 9.737 0.000

Total_effect_c | 0.021 0.002 8.828 0.000

Proportion of total effect that is mediated: -0.126

Ratio of indirect to direct effect: -0.112

Ratio of total to direct effect: 0.888

Chaoyang vpop

Sobel-Goodman Mediation Tests

| Est Std_err z P>|z|

---------------------+-----------------------------------------------

Sobel | 0.001 0.000 1.838 0.066

Aroian | 0.001 0.000 1.802 0.072

Goodman | 0.001 0.000 1.876 0.061

Indirect, Direct, and Total Effects

| Est Std_err z P>|z|

---------------------+-----------------------------------------------

a_coefficient | -326.383 71.527 -4.563 0.000

b_coefficient | -0.000 0.000 -2.008 0.045

Indirect_effect_aXb | 0.001 0.000 1.838 0.066

Direct_effect_c' | 0.021 0.002 8.532 0.000

Total_effect_c | 0.021 0.002 8.828 0.000

Proportion of total effect that is mediated: 0.028

Ratio of indirect to direct effect: 0.028

Ratio of total to direct effect: 1.028

2.1.6. Dongcheng

Dongcheng gdp

Sobel-Goodman Mediation Tests

| Est Std_err z P>|z|

---------------------+-----------------------------------------------

Sobel | 0.017 0.002 8.907 0.000

Aroian | 0.017 0.002 8.895 0.000

Goodman | 0.017 0.002 8.921 0.000

Indirect, Direct, and Total Effects

| Est Std_err z P>|z|

---------------------+-----------------------------------------------

a_coefficient | 3.666 0.328 11.175 0.000

b_coefficient | 0.005 0.000 14.751 0.000

Indirect_effect_aXb | 0.017 0.002 8.907 0.000

Direct_effect_c' | 0.003 0.003 0.970 0.332

Total_effect_c | 0.020 0.004 5.608 0.000

Proportion of total effect that is mediated: 0.834

Ratio of indirect to direct effect: 5.008

Ratio of total to direct effect: 6.008

Dongcheng imp

Sobel-Goodman Mediation Tests

| Est Std_err z P>|z|

---------------------+-----------------------------------------------

Sobel | 0.015 0.002 8.271 0.000

Aroian | 0.015 0.002 8.259 0.000

Goodman | 0.015 0.002 8.283 0.000

Indirect, Direct, and Total Effects

| Est Std_err z P>|z|

---------------------+-----------------------------------------------

a_coefficient | -0.045 0.003 -16.060 0.000

b_coefficient | -0.340 0.035 -9.649 0.000

Indirect_effect_aXb | 0.015 0.002 8.271 0.000

Direct_effect_c' | 0.005 0.004 1.433 0.152

Total_effect_c | 0.020 0.003 5.960 0.000

Proportion of total effect that is mediated: 0.744

Ratio of indirect to direct effect: 2.903

Ratio of total to direct effect: 3.903

Dongcheng ntl

Sobel-Goodman Mediation Tests

| Est Std_err z P>|z|

---------------------+-----------------------------------------------

Sobel | -0.008 0.002 -4.102 0.000

Aroian | -0.008 0.002 -4.096 0.000

Goodman | -0.008 0.002 -4.108 0.000

Indirect, Direct, and Total Effects

| Est Std_err z P>|z|

---------------------+-----------------------------------------------

a_coefficient | 63.138 3.419 18.469 0.000

b_coefficient | -0.000 0.000 -4.207 0.000

Indirect_effect_aXb | -0.008 0.002 -4.102 0.000

Direct_effect_c' | 0.028 0.004 7.288 0.000

Total_effect_c | 0.020 0.003 5.960 0.000

Proportion of total effect that is mediated: -0.385

Ratio of indirect to direct effect: -0.278

Ratio of total to direct effect: 0.722

Dongcheng pop

Sobel-Goodman Mediation Tests

| Est Std_err z P>|z|

---------------------+-----------------------------------------------

Sobel | 0.008 0.003 3.210 0.001

Aroian | 0.008 0.003 3.208 0.001

Goodman | 0.008 0.003 3.213 0.001

Indirect, Direct, and Total Effects

| Est Std_err z P>|z|

---------------------+-----------------------------------------------

a_coefficient | 2509.671 98.622 25.447 0.000

b_coefficient | 0.000 0.000 3.236 0.001

Indirect_effect_aXb | 0.008 0.003 3.210 0.001

Direct_effect_c' | 0.012 0.004 2.818 0.005

Total_effect_c | 0.020 0.003 5.960 0.000

Proportion of total effect that is mediated: 0.409

Ratio of indirect to direct effect: 0.693

Ratio of total to direct effect: 1.693

Dongcheng vgdp

Sobel-Goodman Mediation Tests

| Est Std_err z P>|z|

---------------------+-----------------------------------------------

Sobel | 0.004 0.001 4.193 0.000

Aroian | 0.004 0.001 4.171 0.000

Goodman | 0.004 0.001 4.215 0.000

Indirect, Direct, and Total Effects

| Est Std_err z P>|z|

---------------------+-----------------------------------------------

a_coefficient | -0.281 0.058 -4.812 0.000

b_coefficient | -0.016 0.002 -8.541 0.000

Indirect_effect_aXb | 0.004 0.001 4.193 0.000

Direct_effect_c' | 0.016 0.003 4.468 0.000

Total_effect_c | 0.020 0.004 5.608 0.000

Proportion of total effect that is mediated: 0.221

Ratio of indirect to direct effect: 0.284

Ratio of total to direct effect: 1.284

Dongcheng vimp

Sobel-Goodman Mediation Tests

| Est Std_err z P>|z|

---------------------+-----------------------------------------------

Sobel | 0.003 0.001 2.738 0.006

Aroian | 0.003 0.001 2.723 0.006

Goodman | 0.003 0.001 2.753 0.006

Indirect, Direct, and Total Effects

| Est Std_err z P>|z|

---------------------+-----------------------------------------------

a_coefficient | 0.016 0.002 9.234 0.000

b_coefficient | 0.166 0.058 2.867 0.004

Indirect_effect_aXb | 0.003 0.001 2.738 0.006

Direct_effect_c' | 0.018 0.004 5.006 0.000

Total_effect_c | 0.020 0.003 5.960 0.000

Proportion of total effect that is mediated: 0.132

Ratio of indirect to direct effect: 0.152

Ratio of total to direct effect: 1.152

Dongcheng vntl

Sobel-Goodman Mediation Tests

| Est Std_err z P>|z|

---------------------+-----------------------------------------------

Sobel | -0.006 0.001 -4.520 0.000

Aroian | -0.006 0.001 -4.504 0.000

Goodman | -0.006 0.001 -4.535 0.000

Indirect, Direct, and Total Effects

| Est Std_err z P>|z|

---------------------+-----------------------------------------------

a_coefficient | -18.597 1.689 -11.010 0.000

b_coefficient | 0.000 0.000 4.957 0.000

Indirect_effect_aXb | -0.006 0.001 -4.520 0.000

Direct_effect_c' | 0.026 0.004 7.265 0.000

Total_effect_c | 0.020 0.003 5.960 0.000

Proportion of total effect that is mediated: -0.270

Ratio of indirect to direct effect: -0.212

Ratio of total to direct effect: 0.788

Dongcheng vpop

Sobel-Goodman Mediation Tests

| Est Std_err z P>|z|

---------------------+-----------------------------------------------

Sobel | 0.001 0.000 2.048 0.041

Aroian | 0.001 0.000 1.990 0.047

Goodman | 0.001 0.000 2.112 0.035

Indirect, Direct, and Total Effects

| Est Std_err z P>|z|

---------------------+-----------------------------------------------

a_coefficient | -190.244 66.302 -2.869 0.004

b_coefficient | -0.000 0.000 -2.925 0.003

Indirect_effect_aXb | 0.001 0.000 2.048 0.041

Direct_effect_c' | 0.020 0.003 5.709 0.000

Total_effect_c | 0.020 0.003 5.960 0.000

Proportion of total effect that is mediated: 0.042

Ratio of indirect to direct effect: 0.044

Ratio of total to direct effect: 1.044

2.1.7. Daxing

Daxing gdp

Sobel-Goodman Mediation Tests

| Est Std_err z P>|z|

---------------------+-----------------------------------------------

Sobel | -0.018 0.002 -10.514 0.000

Aroian | -0.018 0.002 -10.508 0.000

Goodman | -0.018 0.002 -10.521 0.000

Indirect, Direct, and Total Effects

| Est Std_err z P>|z|

---------------------+-----------------------------------------------

a_coefficient | -4.362 0.164 -26.630 0.000

b_coefficient | 0.004 0.000 11.444 0.000

Indirect_effect_aXb | -0.018 0.002 -10.514 0.000

Direct_effect_c' | -0.011 0.003 -3.791 0.000

Total_effect_c | -0.029 0.002 -11.839 0.000

Proportion of total effect that is mediated: 0.629

Ratio of indirect to direct effect: 1.693

Ratio of total to direct effect: 2.693

Daxing imp

Sobel-Goodman Mediation Tests

| Est Std_err z P>|z|

---------------------+-----------------------------------------------

Sobel | -0.016 0.001 -10.753 0.000

Aroian | -0.016 0.001 -10.745 0.000

Goodman | -0.016 0.001 -10.760 0.000

Indirect, Direct, and Total Effects

| Est Std_err z P>|z|

---------------------+-----------------------------------------------

a_coefficient | 0.050 0.002 24.223 0.000

b_coefficient | -0.324 0.027 -12.000 0.000

Indirect_effect_aXb | -0.016 0.001 -10.753 0.000

Direct_effect_c' | -0.011 0.003 -4.341 0.000

Total_effect_c | -0.028 0.002 -11.601 0.000

Proportion of total effect that is mediated: 0.583

Ratio of indirect to direct effect: 1.400

Ratio of total to direct effect: 2.400

Daxing ntl

Sobel-Goodman Mediation Tests

| Est Std_err z P>|z|

---------------------+-----------------------------------------------

Sobel | -0.001 0.001 -2.526 0.012

Aroian | -0.001 0.001 -2.513 0.012

Goodman | -0.001 0.001 -2.538 0.011

Indirect, Direct, and Total Effects

| Est Std_err z P>|z|

---------------------+-----------------------------------------------

a_coefficient | -33.263 3.395 -9.798 0.000

b_coefficient | 0.000 0.000 2.614 0.009

Indirect_effect_aXb | -0.001 0.001 -2.526 0.012

Direct_effect_c' | -0.026 0.002 -10.703 0.000

Total_effect_c | -0.028 0.002 -11.601 0.000

Proportion of total effect that is mediated: 0.053

Ratio of indirect to direct effect: 0.056

Ratio of total to direct effect: 1.056

Daxing pop

Sobel-Goodman Mediation Tests

| Est Std_err z P>|z|

---------------------+-----------------------------------------------

Sobel | 0.000 0.000 0.842 0.400

Aroian | 0.000 0.000 0.835 0.404

Goodman | 0.000 0.000 0.849 0.396

Indirect, Direct, and Total Effects

| Est Std_err z P>|z|

---------------------+-----------------------------------------------

a_coefficient | -1165.514 153.418 -7.597 0.000

b_coefficient | -0.000 0.000 -0.847 0.397

Indirect_effect_aXb | 0.000 0.000 0.842 0.400

Direct_effect_c' | -0.028 0.002 -11.562 0.000

Total_effect_c | -0.028 0.002 -11.601 0.000

Proportion of total effect that is mediated: -0.013

Ratio of indirect to direct effect: -0.013

Ratio of total to direct effect: 0.987

Daxing vgdp

Sobel-Goodman Mediation Tests

| Est Std_err z P>|z|

---------------------+-----------------------------------------------

Sobel | -0.008 0.001 -7.857 0.000

Aroian | -0.008 0.001 -7.842 0.000

Goodman | -0.008 0.001 -7.871 0.000

Indirect, Direct, and Total Effects

| Est Std_err z P>|z|

---------------------+-----------------------------------------------

a_coefficient | 0.384 0.029 13.360 0.000

b_coefficient | -0.020 0.002 -9.714 0.000

Indirect_effect_aXb | -0.008 0.001 -7.857 0.000

Direct_effect_c' | -0.021 0.002 -8.419 0.000

Total_effect_c | -0.029 0.002 -11.839 0.000

Proportion of total effect that is mediated: 0.271

Ratio of indirect to direct effect: 0.371

Ratio of total to direct effect: 1.371

Daxing vimp

Sobel-Goodman Mediation Tests

| Est Std_err z P>|z|

---------------------+-----------------------------------------------

Sobel | -0.004 0.001 -4.564 0.000

Aroian | -0.004 0.001 -4.552 0.000

Goodman | -0.004 0.001 -4.576 0.000

Indirect, Direct, and Total Effects

| Est Std_err z P>|z|

---------------------+-----------------------------------------------

a_coefficient | -0.015 0.001 -12.975 0.000

b_coefficient | 0.243 0.050 4.876 0.000

Indirect_effect_aXb | -0.004 0.001 -4.564 0.000

Direct_effect_c' | -0.024 0.002 -9.678 0.000

Total_effect_c | -0.028 0.002 -11.601 0.000

Proportion of total effect that is mediated: 0.131

Ratio of indirect to direct effect: 0.151

Ratio of total to direct effect: 1.151

Daxing vntl

Sobel-Goodman Mediation Tests

| Est Std_err z P>|z|

---------------------+-----------------------------------------------

Sobel | 0.000 0.000 1.239 0.215

Aroian | 0.000 0.000 1.201 0.230

Goodman | 0.000 0.000 1.281 0.200

Indirect, Direct, and Total Effects

| Est Std_err z P>|z|

---------------------+-----------------------------------------------

a_coefficient | 5.706 1.534 3.720 0.000

b_coefficient | 0.000 0.000 1.314 0.189

Indirect_effect_aXb | 0.000 0.000 1.239 0.215

Direct_effect_c' | -0.028 0.002 -11.675 0.000

Total_effect_c | -0.028 0.002 -11.601 0.000

Proportion of total effect that is mediated: -0.010

Ratio of indirect to direct effect: -0.010

Ratio of total to direct effect: 0.990

Daxing vpop

Sobel-Goodman Mediation Tests

| Est Std_err z P>|z|

---------------------+-----------------------------------------------

Sobel | -0.000 0.000 -1.181 0.238

Aroian | -0.000 0.000 -1.134 0.257

Goodman | -0.000 0.000 -1.234 0.217

Indirect, Direct, and Total Effects

| Est Std_err z P>|z|

---------------------+-----------------------------------------------

a_coefficient | 325.052 101.748 3.195 0.001

b_coefficient | -0.000 0.000 -1.271 0.204

Indirect_effect_aXb | -0.000 0.000 -1.181 0.238

Direct_effect_c' | -0.027 0.002 -11.471 0.000

Total_effect_c | -0.028 0.002 -11.601 0.000

Proportion of total effect that is mediated: 0.008

Ratio of indirect to direct effect: 0.009

Ratio of total to direct effect: 1.009

2.2.8. Fangshan

Fangshan gdp

Sobel-Goodman Mediation Tests

| Est Std_err z P>|z|

---------------------+-----------------------------------------------

Sobel | -0.024 0.002 -10.713 0.000

Aroian | -0.024 0.002 -10.707 0.000

Goodman | -0.024 0.002 -10.719 0.000

Indirect, Direct, and Total Effects

| Est Std_err z P>|z|

---------------------+-----------------------------------------------

a_coefficient | -4.583 0.162 -28.288 0.000

b_coefficient | 0.005 0.000 11.575 0.000

Indirect_effect_aXb | -0.024 0.002 -10.713 0.000

Direct_effect_c' | -0.005 0.004 -1.386 0.166

Total_effect_c | -0.029 0.003 -9.890 0.000

Proportion of total effect that is mediated: 0.833

Ratio of indirect to direct effect: 4.985

Ratio of total to direct effect: 5.985

Fangshan imp

Sobel-Goodman Mediation Tests

| Est Std_err z P>|z|

---------------------+-----------------------------------------------

Sobel | -0.010 0.001 -8.379 0.000

Aroian | -0.010 0.001 -8.364 0.000

Goodman | -0.010 0.001 -8.394 0.000

Indirect, Direct, and Total Effects

| Est Std_err z P>|z|

---------------------+-----------------------------------------------

a_coefficient | 0.024 0.002 11.605 0.000

b_coefficient | -0.389 0.032 -12.109 0.000

Indirect_effect_aXb | -0.010 0.001 -8.379 0.000

Direct_effect_c' | -0.022 0.003 -7.832 0.000

Total_effect_c | -0.032 0.003 -11.178 0.000

Proportion of total effect that is mediated: 0.302

Ratio of indirect to direct effect: 0.432

Ratio of total to direct effect: 1.432

Fangshan ntl

Sobel-Goodman Mediation Tests

| Est Std_err z P>|z|

---------------------+-----------------------------------------------

Sobel | -0.003 0.001 -3.935 0.000

Aroian | -0.003 0.001 -3.920 0.000

Goodman | -0.003 0.001 -3.951 0.000

Indirect, Direct, and Total Effects

| Est Std_err z P>|z|

---------------------+-----------------------------------------------

a_coefficient | -48.086 4.582 -10.495 0.000

b_coefficient | 0.000 0.000 4.245 0.000

Indirect_effect_aXb | -0.003 0.001 -3.935 0.000

Direct_effect_c' | -0.028 0.003 -9.788 0.000

Total_effect_c | -0.032 0.003 -11.178 0.000

Proportion of total effect that is mediated: 0.099

Ratio of indirect to direct effect: 0.110

Ratio of total to direct effect: 1.110

Fangshan pop

Sobel-Goodman Mediation Tests

| Est Std_err z P>|z|

---------------------+-----------------------------------------------

Sobel | 0.000 0.000 0.774 0.439

Aroian | 0.000 0.000 0.762 0.446

Goodman | 0.000 0.000 0.786 0.432

Indirect, Direct, and Total Effects

| Est Std_err z P>|z|

---------------------+-----------------------------------------------

a_coefficient | -1161.138 208.728 -5.563 0.000

b_coefficient | -0.000 0.000 -0.781 0.435

Indirect_effect_aXb | 0.000 0.000 0.774 0.439

Direct_effect_c' | -0.032 0.003 -11.178 0.000

Total_effect_c | -0.032 0.003 -11.178 0.000

Proportion of total effect that is mediated: -0.010

Ratio of indirect to direct effect: -0.010

Ratio of total to direct effect: 0.990

Fangshan vgdp

Sobel-Goodman Mediation Tests

| Est Std_err z P>|z|

---------------------+-----------------------------------------------

Sobel | -0.003 0.001 -3.925 0.000

Aroian | -0.003 0.001 -3.905 0.000

Goodman | -0.003 0.001 -3.945 0.000

Indirect, Direct, and Total Effects

| Est Std_err z P>|z|

---------------------+-----------------------------------------------

a_coefficient | 0.320 0.036 8.862 0.000

b_coefficient | -0.009 0.002 -4.378 0.000

Indirect_effect_aXb | -0.003 0.001 -3.925 0.000

Direct_effect_c' | -0.026 0.003 -8.699 0.000

Total_effect_c | -0.029 0.003 -9.890 0.000

Proportion of total effect that is mediated: 0.102

Ratio of indirect to direct effect: 0.114

Ratio of total to direct effect: 1.114

Fangshan vimp

Sobel-Goodman Mediation Tests

| Est Std_err z P>|z|

---------------------+-----------------------------------------------

Sobel | -0.003 0.001 -4.733 0.000

Aroian | -0.003 0.001 -4.707 0.000

Goodman | -0.003 0.001 -4.760 0.000

Indirect, Direct, and Total Effects

| Est Std_err z P>|z|

---------------------+-----------------------------------------------

a_coefficient | -0.007 0.001 -6.710 0.000

b_coefficient | 0.425 0.064 6.679 0.000

Indirect_effect_aXb | -0.003 0.001 -4.733 0.000

Direct_effect_c' | -0.028 0.003 -10.066 0.000

Total_effect_c | -0.032 0.003 -11.178 0.000

Proportion of total effect that is mediated: 0.099

Ratio of indirect to direct effect: 0.110

Ratio of total to direct effect: 1.110

Fangshan vntl

Sobel-Goodman Mediation Tests

| Est Std_err z P>|z|

---------------------+-----------------------------------------------

Sobel | 0.000 0.000 1.073 0.283

Aroian | 0.000 0.000 0.974 0.330

Goodman | 0.000 0.000 1.210 0.226

Indirect, Direct, and Total Effects

| Est Std_err z P>|z|

---------------------+-----------------------------------------------

a_coefficient | 3.341 2.055 1.626 0.104

b_coefficient | 0.000 0.000 1.427 0.153

Indirect_effect_aXb | 0.000 0.000 1.073 0.283

Direct_effect_c' | -0.032 0.003 -11.231 0.000

Total_effect_c | -0.032 0.003 -11.178 0.000

Proportion of total effect that is mediated: -0.005

Ratio of indirect to direct effect: -0.005

Ratio of total to direct effect: 0.995

Fangshan vpop

Sobel-Goodman Mediation Tests

| Est Std_err z P>|z|

---------------------+-----------------------------------------------

Sobel | -0.000 0.000 -1.551 0.121

Aroian | -0.000 0.000 -1.491 0.136

Goodman | -0.000 0.000 -1.618 0.106

Indirect, Direct, and Total Effects

| Est Std_err z P>|z|

---------------------+-----------------------------------------------

a_coefficient | 412.915 138.049 2.991 0.003

b_coefficient | -0.000 0.000 -1.813 0.070

Indirect_effect_aXb | -0.000 0.000 -1.551 0.121

Direct_effect_c' | -0.031 0.003 -11.020 0.000

Total_effect_c | -0.032 0.003 -11.178 0.000

Proportion of total effect that is mediated: 0.012

Ratio of indirect to direct effect: 0.012

Ratio of total to direct effect: 1.012

2.1.9. Tongzhou

Tongzhou gdp

Sobel-Goodman Mediation Tests

| Est Std_err z P>|z|

---------------------+-----------------------------------------------

Sobel | -0.014 0.002 -9.183 0.000

Aroian | -0.014 0.002 -9.175 0.000

Goodman | -0.014 0.002 -9.191 0.000

Indirect, Direct, and Total Effects

| Est Std_err z P>|z|

---------------------+-----------------------------------------------

a_coefficient | -3.062 0.142 -21.523 0.000

b_coefficient | 0.005 0.000 10.154 0.000

Indirect_effect_aXb | -0.014 0.002 -9.183 0.000

Direct_effect_c' | -0.022 0.003 -7.626 0.000

Total_effect_c | -0.036 0.003 -13.953 0.000

Proportion of total effect that is mediated: 0.394

Ratio of indirect to direct effect: 0.651

Ratio of total to direct effect: 1.651

Tongzhou imp

Sobel-Goodman Mediation Tests

| Est Std_err z P>|z|

---------------------+-----------------------------------------------

Sobel | -0.013 0.001 -10.493 0.000

Aroian | -0.013 0.001 -10.482 0.000

Goodman | -0.013 0.001 -10.503 0.000

Indirect, Direct, and Total Effects

| Est Std_err z P>|z|

---------------------+-----------------------------------------------

a_coefficient | 0.035 0.002 17.711 0.000

b_coefficient | -0.385 0.030 -13.024 0.000

Indirect_effect_aXb | -0.013 0.001 -10.493 0.000

Direct_effect_c' | -0.023 0.003 -8.928 0.000

Total_effect_c | -0.036 0.002 -14.728 0.000

Proportion of total effect that is mediated: 0.370

Ratio of indirect to direct effect: 0.587

Ratio of total to direct effect: 1.587

Tongzhou ntl

Sobel-Goodman Mediation Tests

| Est Std_err z P>|z|

---------------------+-----------------------------------------------

Sobel | -0.002 0.000 -3.941 0.000

Aroian | -0.002 0.000 -3.912 0.000

Goodman | -0.002 0.000 -3.971 0.000

Indirect, Direct, and Total Effects

| Est Std_err z P>|z|

---------------------+-----------------------------------------------

a_coefficient | -20.321 4.104 -4.952 0.000

b_coefficient | 0.000 0.000 6.509 0.000

Indirect_effect_aXb | -0.002 0.000 -3.941 0.000

Direct_effect_c' | -0.034 0.002 -14.010 0.000

Total_effect_c | -0.036 0.002 -14.728 0.000

Proportion of total effect that is mediated: 0.054

Ratio of indirect to direct effect: 0.057

Ratio of total to direct effect: 1.057

Tongzhou pop

Sobel-Goodman Mediation Tests

| Est Std_err z P>|z|

---------------------+-----------------------------------------------

Sobel | 0.000 0.000 0.363 0.716

Aroian | 0.000 0.000 0.356 0.722

Goodman | 0.000 0.000 0.371 0.711

Indirect, Direct, and Total Effects

| Est Std_err z P>|z|

---------------------+-----------------------------------------------

a_coefficient | -922.259 188.025 -4.905 0.000

b_coefficient | -0.000 0.000 -0.364 0.716

Indirect_effect_aXb | 0.000 0.000 0.363 0.716

Direct_effect_c' | -0.036 0.002 -14.660 0.000

Total_effect_c | -0.036 0.002 -14.728 0.000

Proportion of total effect that is mediated: -0.003

Ratio of indirect to direct effect: -0.003

Ratio of total to direct effect: 0.997

Tongzhou vgdp

Sobel-Goodman Mediation Tests

| Est Std_err z P>|z|

---------------------+-----------------------------------------------

Sobel | -0.001 0.000 -1.865 0.062

Aroian | -0.001 0.001 -1.848 0.065

Goodman | -0.001 0.000 -1.882 0.060

Indirect, Direct, and Total Effects

| Est Std_err z P>|z|

---------------------+-----------------------------------------------

a_coefficient | 0.218 0.030 7.169 0.000

b_coefficient | -0.004 0.002 -1.931 0.053

Indirect_effect_aXb | -0.001 0.000 -1.865 0.062

Direct_effect_c' | -0.035 0.003 -13.375 0.000

Total_effect_c | -0.036 0.003 -13.953 0.000

Proportion of total effect that is mediated: 0.026

Ratio of indirect to direct effect: 0.026

Ratio of total to direct effect: 1.026

Tongzhou vimp

Sobel-Goodman Mediation Tests

| Est Std_err z P>|z|

---------------------+-----------------------------------------------

Sobel | -0.003 0.001 -4.038 0.000

Aroian | -0.003 0.001 -4.025 0.000

Goodman | -0.003 0.001 -4.051 0.000

Indirect, Direct, and Total Effects

| Est Std_err z P>|z|

---------------------+-----------------------------------------------

a_coefficient | -0.012 0.001 -11.675 0.000

b_coefficient | 0.246 0.057 4.303 0.000

Indirect_effect_aXb | -0.003 0.001 -4.038 0.000

Direct_effect_c' | -0.033 0.003 -13.026 0.000

Total_effect_c | -0.036 0.002 -14.728 0.000

Proportion of total effect that is mediated: 0.084

Ratio of indirect to direct effect: 0.092

Ratio of total to direct effect: 1.092

Tongzhou vntl

Sobel-Goodman Mediation Tests

| Est Std_err z P>|z|

---------------------+-----------------------------------------------

Sobel | 0.000 0.000 1.776 0.076

Aroian | 0.000 0.000 1.734 0.083

Goodman | 0.000 0.000 1.821 0.069

Indirect, Direct, and Total Effects

| Est Std_err z P>|z|

---------------------+-----------------------------------------------

a_coefficient | 7.282 1.788 4.073 0.000

b_coefficient | 0.000 0.000 1.973 0.048

Indirect_effect_aXb | 0.000 0.000 1.776 0.076

Direct_effect_c' | -0.037 0.002 -14.865 0.000

Total_effect_c | -0.036 0.002 -14.728 0.000

Proportion of total effect that is mediated: -0.014

Ratio of indirect to direct effect: -0.013

Ratio of total to direct effect: 0.987

Tongzhou vpop

Sobel-Goodman Mediation Tests

| Est Std_err z P>|z|

---------------------+-----------------------------------------------

Sobel | -0.000 0.000 -1.582 0.114

Aroian | -0.000 0.000 -1.513 0.130

Goodman | -0.000 0.000 -1.662 0.096

Indirect, Direct, and Total Effects

| Est Std_err z P>|z|

---------------------+-----------------------------------------------

a_coefficient | 318.912 124.136 2.569 0.010

b_coefficient | -0.000 0.000 -2.008 0.045

Indirect_effect_aXb | -0.000 0.000 -1.582 0.114

Direct_effect_c' | -0.036 0.002 -14.584 0.000

Total_effect_c | -0.036 0.002 -14.728 0.000

Proportion of total effect that is mediated: 0.009

Ratio of indirect to direct effect: 0.009

Ratio of total to direct effect: 1.009

2.1.10. Shunyi

Shunyi gdp

Sobel-Goodman Mediation Tests

| Est Std_err z P>|z|

---------------------+-----------------------------------------------

Sobel | -0.013 0.001 -10.067 0.000

Aroian | -0.013 0.001 -10.058 0.000

Goodman | -0.013 0.001 -10.075 0.000

Indirect, Direct, and Total Effects

| Est Std_err z P>|z|

---------------------+-----------------------------------------------

a_coefficient | -3.318 0.153 -21.690 0.000

b_coefficient | 0.004 0.000 11.365 0.000

Indirect_effect_aXb | -0.013 0.001 -10.067 0.000

Direct_effect_c' | -0.021 0.002 -8.982 0.000

Total_effect_c | -0.034 0.002 -15.812 0.000

Proportion of total effect that is mediated: 0.378

Ratio of indirect to direct effect: 0.607

Ratio of total to direct effect: 1.607

Shunyi imp

Sobel-Goodman Mediation Tests

| Est Std_err z P>|z|

---------------------+-----------------------------------------------

Sobel | -0.012 0.001 -10.636 0.000

Aroian | -0.012 0.001 -10.626 0.000

Goodman | -0.012 0.001 -10.645 0.000

Indirect, Direct, and Total Effects

| Est Std_err z P>|z|

---------------------+-----------------------------------------------

a_coefficient | 0.033 0.002 19.984 0.000

b_coefficient | -0.366 0.029 -12.563 0.000

Indirect_effect_aXb | -0.012 0.001 -10.636 0.000

Direct_effect_c' | -0.025 0.002 -11.236 0.000

Total_effect_c | -0.037 0.002 -17.707 0.000

Proportion of total effect that is mediated: 0.326

Ratio of indirect to direct effect: 0.484

Ratio of total to direct effect: 1.484

Shunyi ntl

Sobel-Goodman Mediation Tests

| Est Std_err z P>|z|

---------------------+-----------------------------------------------

Sobel | -0.002 0.000 -4.735 0.000

Aroian | -0.002 0.000 -4.711 0.000

Goodman | -0.002 0.000 -4.760 0.000

Indirect, Direct, and Total Effects

| Est Std_err z P>|z|

---------------------+-----------------------------------------------

a_coefficient | -27.107 3.449 -7.859 0.000

b_coefficient | 0.000 0.000 5.933 0.000

Indirect_effect_aXb | -0.002 0.000 -4.735 0.000

Direct_effect_c' | -0.034 0.002 -16.470 0.000

Total_effect_c | -0.037 0.002 -17.707 0.000

Proportion of total effect that is mediated: 0.063

Ratio of indirect to direct effect: 0.067

Ratio of total to direct effect: 1.067

Shunyi pop

Sobel-Goodman Mediation Tests

| Est Std_err z P>|z|

---------------------+-----------------------------------------------

Sobel | 0.000 0.000 0.216 0.829

Aroian | 0.000 0.000 0.215 0.830

Goodman | 0.000 0.000 0.218 0.827

Indirect, Direct, and Total Effects

| Est Std_err z P>|z|

---------------------+-----------------------------------------------

a_coefficient | -1127.405 151.751 -7.429 0.000

b_coefficient | -0.000 0.000 -0.217 0.829

Indirect_effect_aXb | 0.000 0.000 0.216 0.829

Direct_effect_c' | -0.037 0.002 -17.465 0.000

Total_effect_c | -0.037 0.002 -17.707 0.000

Proportion of total effect that is mediated: -0.002

Ratio of indirect to direct effect: -0.002

Ratio of total to direct effect: 0.998

Shunyi vgdp

Sobel-Goodman Mediation Tests

| Est Std_err z P>|z|

---------------------+-----------------------------------------------

Sobel | 0.000 0.000 0.556 0.578

Aroian | 0.000 0.000 0.552 0.581

Goodman | 0.000 0.000 0.560 0.576

Indirect, Direct, and Total Effects

| Est Std_err z P>|z|

---------------------+-----------------------------------------------

a_coefficient | 0.267 0.030 8.812 0.000

b_coefficient | 0.001 0.002 0.557 0.577

Indirect_effect_aXb | 0.000 0.000 0.556 0.578

Direct_effect_c' | -0.034 0.002 -15.554 0.000

Total_effect_c | -0.034 0.002 -15.812 0.000

Proportion of total effect that is mediated: -0.008

Ratio of indirect to direct effect: -0.008

Ratio of total to direct effect: 0.992

Shunyi vimp

Sobel-Goodman Mediation Tests

| Est Std_err z P>|z|

---------------------+-----------------------------------------------

Sobel | -0.006 0.001 -6.533 0.000

Aroian | -0.006 0.001 -6.525 0.000

Goodman | -0.006 0.001 -6.542 0.000

Indirect, Direct, and Total Effects

| Est Std_err z P>|z|

---------------------+-----------------------------------------------

a_coefficient | -0.017 0.001 -18.443 0.000

b_coefficient | 0.368 0.053 6.986 0.000

Indirect_effect_aXb | -0.006 0.001 -6.533 0.000

Direct_effect_c' | -0.030 0.002 -13.584 0.000

Total_effect_c | -0.037 0.002 -17.707 0.000

Proportion of total effect that is mediated: 0.172

Ratio of indirect to direct effect: 0.208

Ratio of total to direct effect: 1.208

Shunyi vntl

Sobel-Goodman Mediation Tests

| Est Std_err z P>|z|

---------------------+-----------------------------------------------

Sobel | 0.001 0.000 3.063 0.002

Aroian | 0.001 0.000 3.037 0.002

Goodman | 0.001 0.000 3.090 0.002

Indirect, Direct, and Total Effects

| Est Std_err z P>|z|

---------------------+-----------------------------------------------

a_coefficient | 10.235 1.520 6.734 0.000

b_coefficient | 0.000 0.000 3.440 0.001

Indirect_effect_aXb | 0.001 0.000 3.063 0.002

Direct_effect_c' | -0.038 0.002 -18.083 0.000

Total_effect_c | -0.037 0.002 -17.707 0.000

Proportion of total effect that is mediated: -0.031

Ratio of indirect to direct effect: -0.030

Ratio of total to direct effect: 0.970

Shunyi vpop

Sobel-Goodman Mediation Tests

| Est Std_err z P>|z|

---------------------+-----------------------------------------------

Sobel | -0.000 0.000 -1.998 0.046

Aroian | -0.000 0.000 -1.947 0.052

Goodman | -0.000 0.000 -2.053 0.040

Indirect, Direct, and Total Effects

| Est Std_err z P>|z|

---------------------+-----------------------------------------------

a_coefficient | 363.758 100.215 3.630 0.000

b_coefficient | -0.000 0.000 -2.393 0.017

Indirect_effect_aXb | -0.000 0.000 -1.998 0.046

Direct_effect_c' | -0.036 0.002 -17.456 0.000

Total_effect_c | -0.037 0.002 -17.707 0.000

Proportion of total effect that is mediated: 0.012

Ratio of indirect to direct effect: 0.012

Ratio of total to direct effect: 1.012

**2.2 Sobel test for streets with different population densities**

This section corresponds to Table 6 (The proportion of mediating effects of mechanism variables in subdistricts with different population densities in the central urban area.)

2.2.1. HDS in CUA

HDS in CUA gdp

Sobel-Goodman Mediation Tests

| Est Std_err z P>|z|

---------------------+-----------------------------------------------

Sobel | 0.017 0.002 11.032 0.000

Aroian | 0.017 0.002 11.020 0.000

Goodman | 0.017 0.002 11.043 0.000

Indirect, Direct, and Total Effects

| Est Std_err z P>|z|

---------------------+-----------------------------------------------

a_coefficient | 3.699 0.237 15.612 0.000

b_coefficient | 0.005 0.000 15.591 0.000

Indirect_effect_aXb | 0.017 0.002 11.032 0.000

Direct_effect_c' | 0.008 0.003 3.115 0.002

Total_effect_c | 0.025 0.003 9.533 0.000

Proportion of total effect that is mediated: 0.673

Ratio of indirect to direct effect: 2.059

Ratio of total to direct effect: 3.059

HDS in CUA imp

Sobel-Goodman Mediation Tests

| Est Std_err z P>|z|

---------------------+-----------------------------------------------

Sobel | 0.015 0.002 9.290 0.000

Aroian | 0.015 0.002 9.282 0.000

Goodman | 0.015 0.002 9.298 0.000

Indirect, Direct, and Total Effects

| Est Std_err z P>|z|

---------------------+-----------------------------------------------

a_coefficient | -0.045 0.002 -21.944 0.000

b_coefficient | -0.335 0.033 -10.255 0.000

Indirect_effect_aXb | 0.015 0.002 9.290 0.000

Direct_effect_c' | 0.010 0.003 3.627 0.000

Total_effect_c | 0.025 0.003 10.050 0.000

Proportion of total effect that is mediated: 0.594

Ratio of indirect to direct effect: 1.463

Ratio of total to direct effect: 2.463

HDS in CUA ntl

Sobel-Goodman Mediation Tests

| Est Std_err z P>|z|

---------------------+-----------------------------------------------

Sobel | -0.005 0.002 -3.322 0.001

Aroian | -0.005 0.002 -3.318 0.001

Goodman | -0.005 0.002 -3.325 0.001

Indirect, Direct, and Total Effects

| Est Std_err z P>|z|

---------------------+-----------------------------------------------

a_coefficient | 56.657 2.605 21.753 0.000

b_coefficient | -0.000 0.000 -3.361 0.001

Indirect_effect_aXb | -0.005 0.002 -3.322 0.001

Direct_effect_c' | 0.030 0.003 10.381 0.000

Total_effect_c | 0.025 0.003 10.050 0.000

Proportion of total effect that is mediated: -0.200

Ratio of indirect to direct effect: -0.166

Ratio of total to direct effect: 0.834

HDS in CUA pop

Sobel-Goodman Mediation Tests

| Est Std_err z P>|z|

---------------------+-----------------------------------------------

Sobel | 0.002 0.001 1.679 0.093

Aroian | 0.002 0.001 1.677 0.094

Goodman | 0.002 0.001 1.681 0.093

Indirect, Direct, and Total Effects

| Est Std_err z P>|z|

---------------------+-----------------------------------------------

a_coefficient | 2438.552 113.766 21.435 0.000

b_coefficient | 0.000 0.000 1.684 0.092

Indirect_effect_aXb | 0.002 0.001 1.679 0.093

Direct_effect_c' | 0.023 0.003 7.803 0.000

Total_effect_c | 0.025 0.003 10.050 0.000

Proportion of total effect that is mediated: 0.099

Ratio of indirect to direct effect: 0.110

Ratio of total to direct effect: 1.110

HDS in CUA vgdp

Sobel-Goodman Mediation Tests

| Est Std_err z P>|z|

---------------------+-----------------------------------------------

Sobel | 0.005 0.001 5.442 0.000

Aroian | 0.005 0.001 5.421 0.000

Goodman | 0.005 0.001 5.464 0.000

Indirect, Direct, and Total Effects

| Est Std_err z P>|z|

---------------------+-----------------------------------------------

a_coefficient | -0.289 0.042 -6.830 0.000

b_coefficient | -0.016 0.002 -9.007 0.000

Indirect_effect_aXb | 0.005 0.001 5.442 0.000

Direct_effect_c' | 0.020 0.003 7.916 0.000

Total_effect_c | 0.025 0.003 9.533 0.000

Proportion of total effect that is mediated: 0.181

Ratio of indirect to direct effect: 0.220

Ratio of total to direct effect: 1.220

HDS in CUA vimp

Sobel-Goodman Mediation Tests

| Est Std_err z P>|z|

---------------------+-----------------------------------------------

Sobel | 0.003 0.001 3.180 0.001

Aroian | 0.003 0.001 3.171 0.002

Goodman | 0.003 0.001 3.190 0.001

Indirect, Direct, and Total Effects

| Est Std_err z P>|z|

---------------------+-----------------------------------------------

a_coefficient | 0.016 0.001 12.727 0.000

b_coefficient | 0.178 0.054 3.284 0.001

Indirect_effect_aXb | 0.003 0.001 3.180 0.001

Direct_effect_c' | 0.022 0.003 8.432 0.000

Total_effect_c | 0.025 0.003 10.050 0.000

Proportion of total effect that is mediated: 0.114

Ratio of indirect to direct effect: 0.129

Ratio of total to direct effect: 1.129

HDS in CUA vntl

Sobel-Goodman Mediation Tests

| Est Std_err z P>|z|

---------------------+-----------------------------------------------

Sobel | -0.005 0.001 -5.403 0.000

Aroian | -0.005 0.001 -5.388 0.000

Goodman | -0.005 0.001 -5.418 0.000

Indirect, Direct, and Total Effects

| Est Std_err z P>|z|

---------------------+-----------------------------------------------

a_coefficient | -16.005 1.326 -12.068 0.000

b_coefficient | 0.000 0.000 6.042 0.000

Indirect_effect_aXb | -0.005 0.001 -5.403 0.000

Direct_effect_c' | 0.030 0.003 11.571 0.000

Total_effect_c | 0.025 0.003 10.050 0.000

Proportion of total effect that is mediated: -0.197

Ratio of indirect to direct effect: -0.165

Ratio of total to direct effect: 0.835

HDS in CUA vpop

Sobel-Goodman Mediation Tests

| Est Std_err z P>|z|

---------------------+-----------------------------------------------

Sobel | 0.001 0.001 1.610 0.107

Aroian | 0.001 0.001 1.600 0.110

Goodman | 0.001 0.001 1.621 0.105

Indirect, Direct, and Total Effects

| Est Std_err z P>|z|

---------------------+-----------------------------------------------

a_coefficient | -706.213 83.169 -8.491 0.000

b_coefficient | -0.000 0.000 -1.640 0.101

Indirect_effect_aXb | 0.001 0.001 1.610 0.107

Direct_effect_c' | 0.024 0.003 9.418 0.000

Total_effect_c | 0.025 0.003 10.050 0.000

Proportion of total effect that is mediated: 0.038

Ratio of indirect to direct effect: 0.040

Ratio of total to direct effect: 1.040

2.2.2. MDS in CUA

MDS in CUA gdp

Sobel-Goodman Mediation Tests

| Est Std_err z P>|z|

---------------------+-----------------------------------------------

Sobel | 0.016 0.001 13.562 0.000

Aroian | 0.016 0.001 13.553 0.000

Goodman | 0.016 0.001 13.570 0.000

Indirect, Direct, and Total Effects

| Est Std_err z P>|z|

---------------------+-----------------------------------------------

a_coefficient | 3.488 0.155 22.544 0.000

b_coefficient | 0.005 0.000 16.977 0.000

Indirect_effect_aXb | 0.016 0.001 13.562 0.000

Direct_effect_c' | 0.013 0.002 6.427 0.000

Total_effect_c | 0.029 0.002 15.344 0.000

Proportion of total effect that is mediated: 0.559

Ratio of indirect to direct effect: 1.265

Ratio of total to direct effect: 2.265

MDS in CUA imp

Sobel-Goodman Mediation Tests

| Est Std_err z P>|z|

---------------------+-----------------------------------------------

Sobel | 0.013 0.001 10.918 0.000

Aroian | 0.013 0.001 10.912 0.000

Goodman | 0.013 0.001 10.924 0.000

Indirect, Direct, and Total Effects

| Est Std_err z P>|z|

---------------------+-----------------------------------------------

a_coefficient | -0.038 0.001 -27.251 0.000

b_coefficient | -0.343 0.029 -11.916 0.000

Indirect_effect_aXb | 0.013 0.001 10.918 0.000

Direct_effect_c' | 0.017 0.002 8.046 0.000

Total_effect_c | 0.030 0.002 16.394 0.000

Proportion of total effect that is mediated: 0.441

Ratio of indirect to direct effect: 0.788

Ratio of total to direct effect: 1.788

MDS in CUA ntl

Sobel-Goodman Mediation Tests

| Est Std_err z P>|z|

---------------------+-----------------------------------------------

Sobel | -0.001 0.001 -1.427 0.153

Aroian | -0.001 0.001 -1.425 0.154

Goodman | -0.001 0.001 -1.430 0.153

Indirect, Direct, and Total Effects

| Est Std_err z P>|z|

---------------------+-----------------------------------------------

a_coefficient | 35.699 2.000 17.848 0.000

b_coefficient | -0.000 0.000 -1.432 0.152

Indirect_effect_aXb | -0.001 0.001 -1.427 0.153

Direct_effect_c' | 0.031 0.002 15.708 0.000

Total_effect_c | 0.030 0.002 16.394 0.000

Proportion of total effect that is mediated: -0.036

Ratio of indirect to direct effect: -0.035

Ratio of total to direct effect: 0.965

MDS in CUA pop

Sobel-Goodman Mediation Tests

| Est Std_err z P>|z|

---------------------+-----------------------------------------------

Sobel | 0.001 0.000 1.480 0.139

Aroian | 0.001 0.000 1.473 0.141

Goodman | 0.001 0.000 1.488 0.137

Indirect, Direct, and Total Effects

| Est Std_err z P>|z|

---------------------+-----------------------------------------------

a_coefficient | 686.514 71.563 9.593 0.000

b_coefficient | 0.000 0.000 1.498 0.134

Indirect_effect_aXb | 0.001 0.000 1.480 0.139

Direct_effect_c' | 0.029 0.002 15.688 0.000

Total_effect_c | 0.030 0.002 16.394 0.000

Proportion of total effect that is mediated: 0.020

Ratio of indirect to direct effect: 0.021

Ratio of total to direct effect: 1.021

MDS in CUA vgdp

Sobel-Goodman Mediation Tests

| Est Std_err z P>|z|

---------------------+-----------------------------------------------

Sobel | 0.003 0.001 5.966 0.000

Aroian | 0.003 0.001 5.946 0.000

Goodman | 0.003 0.001 5.986 0.000

Indirect, Direct, and Total Effects

| Est Std_err z P>|z|

---------------------+-----------------------------------------------

a_coefficient | -0.215 0.028 -7.699 0.000

b_coefficient | -0.015 0.002 -9.438 0.000

Indirect_effect_aXb | 0.003 0.001 5.966 0.000

Direct_effect_c' | 0.026 0.002 13.740 0.000

Total_effect_c | 0.029 0.002 15.344 0.000

Proportion of total effect that is mediated: 0.112

Ratio of indirect to direct effect: 0.126

Ratio of total to direct effect: 1.126

MDS in CUA vimp

Sobel-Goodman Mediation Tests

| Est Std_err z P>|z|

---------------------+-----------------------------------------------

Sobel | 0.003 0.001 3.660 0.000

Aroian | 0.003 0.001 3.654 0.000

Goodman | 0.003 0.001 3.667 0.000

Indirect, Direct, and Total Effects

| Est Std_err z P>|z|

---------------------+-----------------------------------------------

a_coefficient | 0.014 0.001 16.412 0.000

b_coefficient | 0.181 0.048 3.755 0.000

Indirect_effect_aXb | 0.003 0.001 3.660 0.000

Direct_effect_c' | 0.027 0.002 14.055 0.000

Total_effect_c | 0.030 0.002 16.394 0.000

Proportion of total effect that is mediated: 0.086

Ratio of indirect to direct effect: 0.095

Ratio of total to direct effect: 1.095

MDS in CUA vntl

Sobel-Goodman Mediation Tests

| Est Std_err z P>|z|

---------------------+-----------------------------------------------

Sobel | -0.001 0.000 -4.100 0.000

Aroian | -0.001 0.000 -4.073 0.000

Goodman | -0.001 0.000 -4.127 0.000

Indirect, Direct, and Total Effects

| Est Std_err z P>|z|

---------------------+-----------------------------------------------

a_coefficient | -6.919 0.964 -7.178 0.000

b_coefficient | 0.000 0.000 4.995 0.000

Indirect_effect_aXb | -0.001 0.000 -4.100 0.000

Direct_effect_c' | 0.031 0.002 17.092 0.000

Total_effect_c | 0.030 0.002 16.394 0.000

Proportion of total effect that is mediated: -0.050

Ratio of indirect to direct effect: -0.048

Ratio of total to direct effect: 0.952

MDS in CUA vpop

Sobel-Goodman Mediation Tests

| Est Std_err z P>|z|

---------------------+-----------------------------------------------

Sobel | 0.001 0.000 2.670 0.008

Aroian | 0.001 0.000 2.644 0.008

Goodman | 0.001 0.000 2.697 0.007

Indirect, Direct, and Total Effects

| Est Std_err z P>|z|

---------------------+-----------------------------------------------

a_coefficient | -300.643 46.099 -6.522 0.000

b_coefficient | -0.000 0.000 -2.927 0.003

Indirect_effect_aXb | 0.001 0.000 2.670 0.008

Direct_effect_c' | 0.029 0.002 15.808 0.000

Total_effect_c | 0.030 0.002 16.394 0.000

Proportion of total effect that is mediated: 0.027

Ratio of indirect to direct effect: 0.028

Ratio of total to direct effect: 1.028

2.2.3. LDS in UDA

LDS in UDA gdp

Sobel-Goodman Mediation Tests

| Est Std_err z P>|z|

---------------------+-----------------------------------------------

Sobel | -0.016 0.001 -13.201 0.000

Aroian | -0.016 0.001 -13.196 0.000

Goodman | -0.016 0.001 -13.207 0.000

Indirect, Direct, and Total Effects

| Est Std_err z P>|z|

---------------------+-----------------------------------------------

a_coefficient | -4.083 0.134 -30.461 0.000

b_coefficient | 0.004 0.000 14.648 0.000

Indirect_effect_aXb | -0.016 0.001 -13.201 0.000

Direct_effect_c' | -0.017 0.002 -8.971 0.000

Total_effect_c | -0.033 0.002 -19.677 0.000

Proportion of total effect that is mediated: 0.477

Ratio of indirect to direct effect: 0.912

Ratio of total to direct effect: 1.912

LDS in UDA imp

Sobel-Goodman Mediation Tests

| Est Std_err z P>|z|

---------------------+-----------------------------------------------

Sobel | -0.012 0.001 -11.207 0.000

Aroian | -0.012 0.001 -11.202 0.000

Goodman | -0.012 0.001 -11.213 0.000

Indirect, Direct, and Total Effects

| Est Std_err z P>|z|

---------------------+-----------------------------------------------

a_coefficient | 0.040 0.001 29.939 0.000

b_coefficient | -0.294 0.024 -12.086 0.000

Indirect_effect_aXb | -0.012 0.001 -11.207 0.000

Direct_effect_c' | -0.022 0.002 -11.898 0.000

Total_effect_c | -0.034 0.002 -21.026 0.000

Proportion of total effect that is mediated: 0.351

Ratio of indirect to direct effect: 0.542

Ratio of total to direct effect: 1.542

LDS in UDA ntl

Sobel-Goodman Mediation Tests

| Est Std_err z P>|z|

---------------------+-----------------------------------------------

Sobel | -0.001 0.001 -2.275 0.023

Aroian | -0.001 0.001 -2.272 0.023

Goodman | -0.001 0.001 -2.279 0.023

Indirect, Direct, and Total Effects

| Est Std_err z P>|z|

---------------------+-----------------------------------------------

a_coefficient | -36.996 2.143 -17.265 0.000

b_coefficient | 0.000 0.000 2.295 0.022

Indirect_effect_aXb | -0.001 0.001 -2.275 0.023

Direct_effect_c' | -0.032 0.002 -18.993 0.000

Total_effect_c | -0.034 0.002 -21.026 0.000

Proportion of total effect that is mediated: 0.040

Ratio of indirect to direct effect: 0.041

Ratio of total to direct effect: 1.041

LDS in UDA pop

Sobel-Goodman Mediation Tests

| Est Std_err z P>|z|

---------------------+-----------------------------------------------

Sobel | -0.000 0.000 -0.988 0.323

Aroian | -0.000 0.000 -0.985 0.325

Goodman | -0.000 0.000 -0.991 0.322

Indirect, Direct, and Total Effects

| Est Std_err z P>|z|

---------------------+-----------------------------------------------

a_coefficient | -1098.017 89.807 -12.226 0.000

b_coefficient | 0.000 0.000 0.991 0.322

Indirect_effect_aXb | -0.000 0.000 -0.988 0.323

Direct_effect_c' | -0.033 0.002 -20.114 0.000

Total_effect_c | -0.034 0.002 -21.026 0.000

Proportion of total effect that is mediated: 0.012

Ratio of indirect to direct effect: 0.012

Ratio of total to direct effect: 1.012

LDS in UDA vgdp

Sobel-Goodman Mediation Tests

| Est Std_err z P>|z|

---------------------+-----------------------------------------------

Sobel | -0.003 0.000 -6.527 0.000

Aroian | -0.003 0.000 -6.509 0.000

Goodman | -0.003 0.000 -6.545 0.000

Indirect, Direct, and Total Effects

| Est Std_err z P>|z|

---------------------+-----------------------------------------------

a_coefficient | 0.279 0.026 10.694 0.000

b_coefficient | -0.011 0.001 -8.239 0.000

Indirect_effect_aXb | -0.003 0.000 -6.527 0.000

Direct_effect_c' | -0.030 0.002 -17.564 0.000

Total_effect_c | -0.033 0.002 -19.677 0.000

Proportion of total effect that is mediated: 0.097

Ratio of indirect to direct effect: 0.108

Ratio of total to direct effect: 1.108

LDS in UDA vimp

Sobel-Goodman Mediation Tests

| Est Std_err z P>|z|

---------------------+-----------------------------------------------

Sobel | -0.002 0.001 -3.700 0.000

Aroian | -0.002 0.001 -3.695 0.000

Goodman | -0.002 0.001 -3.705 0.000

Indirect, Direct, and Total Effects

| Est Std_err z P>|z|

---------------------+-----------------------------------------------

a_coefficient | -0.016 0.001 -19.316 0.000

b_coefficient | 0.158 0.042 3.770 0.000

Indirect_effect_aXb | -0.002 0.001 -3.700 0.000

Direct_effect_c' | -0.031 0.002 -18.110 0.000

Total_effect_c | -0.034 0.002 -21.026 0.000

Proportion of total effect that is mediated: 0.073

Ratio of indirect to direct effect: 0.078

Ratio of total to direct effect: 1.078

LDS in UDA vntl

Sobel-Goodman Mediation Tests

| Est Std_err z P>|z|

---------------------+-----------------------------------------------

Sobel | 0.001 0.000 3.820 0.000

Aroian | 0.001 0.000 3.792 0.000

Goodman | 0.001 0.000 3.848 0.000

Indirect, Direct, and Total Effects

| Est Std_err z P>|z|

---------------------+-----------------------------------------------

a_coefficient | 6.915 1.008 6.862 0.000

b_coefficient | 0.000 0.000 4.598 0.000

Indirect_effect_aXb | 0.001 0.000 3.820 0.000

Direct_effect_c' | -0.035 0.002 -21.561 0.000

Total_effect_c | -0.034 0.002 -21.026 0.000

Proportion of total effect that is mediated: -0.031

Ratio of indirect to direct effect: -0.031

Ratio of total to direct effect: 0.969

LDS in UDA vpop

Sobel-Goodman Mediation Tests

| Est Std_err z P>|z|

---------------------+-----------------------------------------------

Sobel | -0.000 0.000 -1.353 0.176

Aroian | -0.000 0.000 -1.341 0.180

Goodman | -0.000 0.000 -1.365 0.172

Indirect, Direct, and Total Effects

| Est Std_err z P>|z|

---------------------+-----------------------------------------------

a_coefficient | 436.397 59.113 7.382 0.000

b_coefficient | -0.000 0.000 -1.377 0.169

Indirect_effect_aXb | -0.000 0.000 -1.353 0.176

Direct_effect_c' | -0.033 0.002 -20.569 0.000

Total_effect_c | -0.034 0.002 -21.026 0.000

Proportion of total effect that is mediated: 0.010

Ratio of indirect to direct effect: 0.010

Ratio of total to direct effect: 1.010
